# Functional and structural modifications of influenza antibodies during pregnancy

Madeleine F. Jennewein<sup>1\*</sup>, Martina Kosikova<sup>2\*</sup>, Francesca J. Noelette<sup>1</sup>, Peter Radvak<sup>2</sup>, Carolyn M. Boudreau<sup>1</sup>, James D. Campbell<sup>3</sup>, Wilbur H. Chen<sup>3</sup>, Hang Xie<sup>2#</sup>, Galit Alter<sup>1#</sup> and Marcela F. Pasetti<sup>3,4#</sup>

<sup>1</sup> The Ragon Institute of MGH, MIT, and Harvard, Cambridge, MA 02139

<sup>2</sup> Laboratory of Pediatric and Respiratory Viral Diseases, Division of Viral Products, Office of Vaccines Research and Review, Center for Biologics Evaluation and Research, US Food and Drug Administration, Silver Spring, MD, 20993

<sup>3</sup> Center for Vaccine Development and Global Health, University of Maryland School of Medicine, Baltimore, MD 21201

<sup>4</sup> Lead contact

\* Authors contributed equally to this work

#Corresponding authors: [mpasetti@som.umaryland.edu](mailto:mpasetti@som.umaryland.edu); [hang.xie@fda.hhs.gov](mailto:hang.xie@fda.hhs.gov); [galter@mgd.harvard.edu](mailto:galter@mgd.harvard.edu).

## 18 SUMMARY

19 Pregnancy represents a unique tolerogenic immune state which may alter susceptibility to infection and  
 20 vaccine-response. Here we characterized humoral immunity to seasonal influenza vaccine strains in  
 21 pregnant and non-pregnant women. Pregnant women had reduced hemagglutinin subtype-1 (H1)- IgG,  
 22 IgG1, and IgG2, hemagglutination inhibition and group 1 and 2 stem IgG. However, H1-specific avidity  
 23 and FcγR1 binding increased. Influenza-antibodies in pregnancy had distinct Fc and Fab glycans  
 24 characterized by di-galactosylation and di-sialylation. In contrast, agalactosylation and bisection were  
 25 prominent outside of pregnancy. H1-specific Fc-functionality was moderately reduced in pregnancy,  
 26 although likely compensated by stronger binding to cognate antigen and FcR. Multivariate analysis  
 27 revealed distinct populations characterized by FcγR1 binding, H1-IgG levels, and glycosylation. Pooled  
 28 sera from pregnant women exhibited longer retention *in vivo*. Our results demonstrate structural and  
 29 functional modulation of humoral immunity during pregnancy in an antigen-specific manner towards  
 30 reduced inflammation, increased retention in circulation, and efficient placental transport.

31

32 **Keywords:** Pregnancy, antibodies, IgG, Fc-functionality, Fc-receptors

33

34

## 35 INTRODUCTION

36 The immune system adapts in a precise and unique way during pregnancy to support fetal  
 37 development and facilitate full-term delivery. These adaptations involve changes in cell phenotypes and  
 38 frequencies (Th2 polarization, reduction of circulating NK and T cells, reduction in the number of B  
 39 cells) as well as modulation of cell function (i.e., cytokine production) (Kraus et al. 2010; Kraus et al.  
 40 2012). In addition, antibodies produced during pregnancy display unique glycosylation patterns (Bondt  
 41 et al. 2014; Bondt et al. 2013; Einarsdottir et al. 2013). Collectively, these changes favor a non-  
 42 inflammatory and tolerogenic environment. As a result, auto-immune conditions, such as rheumatoid  
 43 arthritis, may transiently resolve during pregnancy (Kraus et al. 2010; Memoli et al. 2013). It has been  
 44 proposed that a corollary of these alterations is increased maternal susceptibility to pathogens, which  
 45 would also affect fetal health and development. For example, pregnant women are known to  
 46 experience more severe influenza virus infection and are at higher risk of death, as evidenced during  
 47 the 2009 H1N1 pandemic (Kourtis, Read, and Jamieson 2014). During the COVID-19 pandemic,  
 48 symptomatic maternal infection posed a higher risk for unfavorable outcomes requiring hospitalization  
 49 and invasive ventilation (Zambrano et al. 2020) and for fetal complications, including preterm birth,  
 50 growth restriction, and miscarriage (Yee et al. 2020; Barrero-Castillero et al. 2020). These can be  
 51 mitigated by interventions that strengthen prenatal immunity.

52 There is a long history of safe and effective immunization of pregnant women against tetanus  
 53 and diphtheria (Forsyth et al. 2015). In the past decade, the introduction of maternal acellular pertussis  
 54 vaccine (ACIP 2013) propitiously reduced infant hospitalizations and respiratory infections (Ohfuji et al.  
 55 2018; Regan et al. 2016). Seasonal influenza vaccination during pregnancy has been recommended to  
 56 reduce the risk of infection and severity of disease of mothers and young infants (ACIP 2013; Fiore et  
 57 al. 2010; Safety 2014). Several studies have demonstrated efficacy of this approach in reducing both  
 58 maternal and infant hospitalization and illness (Thompson et al. 2019).

Recognizing the value of this strategy to improve public health, a growing number of vaccine candidates intended to strengthen maternal-infant immunity through vaccination during pregnancy are advancing in the clinical pathway (Saso and Kampmann 2020; Vojtek et al. 2018).

Conceivably, the profound physiological changes required to sustain pregnancy may also influence vaccine-induced immunity. Clinical studies of vaccination in pregnancy have focused primarily on the safety of these new interventions and their immunogenicity, through the analysis of serum antibody levels in mothers and their infants (Monath and Nasidi 1993; Sperling et al. 2012; Schlaudecker et al. 2012; Ohfuji et al. 2018; Munoz et al. 2020). A few of these studies have examined maternal T cell responses (Huygen et al. 2015) and/or functional capacity of vaccine-induced antibodies (Jennewein et al. 2019). However, it remains largely undefined whether the state of pregnancy *per se* influences vaccine-induced adaptive immunity and if that is the case, what the implications of such changes would be for both maternal and infant health.

Considering that antibodies are essential for protection against influenza, the goal of this study was to examine the biophysical and functional properties of influenza-specific antibodies in pregnant and non-pregnant women who received seasonal influenza vaccination. We tested the hypothesis that pregnancy-associated structural changes would likely affect both Fab- and non-neutralizing Fc-antibody mediated functions, which are key contributors of protective immunity (Jennewein et al. 2019). To this end, we conducted an in-depth characterization of antibodies to matched seasonal influenza vaccine strains in pregnant and non-pregnant women that included: 1) serum antibody levels determined by hemagglutinin (HA) globular head and stem-specific IgG ELISA, hemagglutination inhibition (HAI) and microneutralization (MN); 2) HA-specific IgG avidity; 3) HA-specific IgG subclasses and Fc receptor binding by ELISA; 4) glycan profile of total and HA-specific IgG Fc and Fab molecules; 5) Fc-mediated innate cell functions: antibody dependent neutrophil phagocytosis (ADNP), antibody dependent monocyte phagocytosis (ADCP), antibody dependent complement deposition (ADCD), and antibody dependent NK cell degranulation; and 6) *in vivo* analysis of maternal IgG retention. Immunological outcomes in the two groups were compared using multivariate analysis. Distinct profiles of influenza-

specific IgG Fab and Fc glycan profiles and function were identified between pregnant and non-pregnant vaccine recipients, with subtype-specific antibodies being differentially affected. Two well-defined segregated clusters were identified by aggregate data analysis. These results support similar studies to inform vaccine development and implementation in this important population.

## RESULTS

### Pregnancy associated differences in influenza-specific antibody titer

To understand pregnancy-associated modulation of humoral immunity, we conducted a comparative analysis of the magnitude, structural features, and functionality of influenza antibodies in pregnant and non-pregnant women after seasonal influenza vaccination (**Supplemental Table 1**).

The breadth of antibody responses was determined through analysis of full-length HA- and HA-stem-specific serum IgG titers (**Figure 1A, B**) and canonical function of influenza antibodies: hemagglutinin inhibition (HAI) and microneutralization (MN) (**Figure 1C, D**). Antibody reactivity was tested against two of the subtypes included in the vaccine 2017-18 northern hemisphere flu vaccine ((WHO) 2017): H1 MI (drifted strain of the 2009 H1N1 pandemic lineage which was included since the 2016-17 Northern Hemisphere vaccine--A/Michigan/45/2015, H1N1) and H3 HK (A/Hong Kong/4801/2014, H3N2), as well as against the original 2009 H1N1 pandemic strain H1 CA (A/California/07/2009, H1N1) that disproportionally and severely affected pregnant women during the 2009 pandemic (Jamieson et al. 2009; Louie et al. 2010).

Pregnant women had significantly lower IgG titers against H1 MI HA, as compared to the non-pregnant, while titers against H1 CA were unaffected (**Figure 1A**). A trend of lower H3-IgG was also observed (**Figure 1A**). Serum IgG directed to the conserved group 1 and group 2 stem regions were both substantially reduced in the pregnant women (**Figure 1B**). Although both groups had similar HAI and MN titers for the contemporary vaccine strains H1 MI and H3 HK (**Figure 1C, D**), pregnant women did exhibit significantly reduced HAI titers against the original pandemic strain H1 CA (**Figure 1C**).

Intriguingly, the avidity of IgG against H1 CA HA was higher in the pregnant women as compared to the non-pregnant (**Figure 1E**). Likewise, a trend of higher IgG avidity against H1 MI HA was observed. Together, these results hint at pregnancy-associated differences in magnitude, canonical functions, and strength of binding of influenza antibodies, which appear to be antigen-specific.

### **Pregnancy influences IgG subclass and Fc receptor binding**

To better understand the profile of influenza-specific antibodies elicited during pregnancy, we conducted a detailed class (IgG, IgA, and IgM) and subclass (IgG 1-4 and IgA (1-2) analysis of serum antibodies specific for full-length Has H1 MI and H3 HK and their binding capacity to different Fc receptors using a multiplex luminex assay (**Figure 2**). Consistent with the ELISA data described above (**Figure 1A**), pregnant women had significantly reduced levels of H1 MI HA-specific total IgG, IgG1, IgG2, and IgG3 as compared to non-pregnant women (**Figure 2A, B**). A similar trend of lower antibody levels (as seen previously by ELISA, in Figure 2) remained for H3 HA-specific IgG and IgG1, and no differences were seen in either H1 MI or H3 HA-specific IgA1, IgA2, or IgM levels between the two groups (**Figure 2A, B**). Pregnant women had a significantly lower ratio of IgG1 and IgG3 to IgG4 for both antigens (**Figure 2C, D**).

Clear differences were also seen in terms of HA antibody binding to Fc-receptors between the two groups (**Figure 2E-H**). Unlike HA-specific antibody binding patterns revealed by ELISA or luminex assays, both H1 MI HA- and H3 HK HA-specific antibodies from pregnant women exhibited increased binding to Fc $\gamma$ R1 as compared to the non-pregnant (**Figure 2E**). No differences in antibody binding capacity to other Fc $\gamma$ R molecules were detected between two groups (**Figure 2F-H**), except for reduced H1 HA-specific IgG binding to Fc $\gamma$ R3 allotypic variant V in the pregnant group (**Figure 2G**).

### **Pregnancy alters antibody Fc and Fab N-glycosylation**

To identify pregnancy-associated changes in influenza-specific antibody glycosylation, we

examined the Fc- and Fab-glycan composition of total and H1 MI- and H3 HK- specific serum IgG in both pregnant and non-pregnant women. For each of the samples, a total of 24 distinct glycan peaks were captured by capillary electrophoresis, and overall changes in the four differentially added sugars (galactose, sialic acid, bisecting n-acetyl glucosamine–GlcNAc–and fucose) were calculated for bulk (Figure 3A, B) and HA-specific (Figure 3C-F, G-V) IgG for each group.

Compared to bulk IgG of non-pregnant women, the bulk Fc glycosylation profile of pregnant women revealed shifts towards increased fucosylation (F) and sialylation (S1 and S2) consistent with an anti-inflammatory phenotype (Figure 3A). On the other hand, pregnant women's bulk Fab had fully fucosylated (F), agalactosylated (G0 and G1) and bisected (B) glycans (Figure 3B, O-V).

In contrast to the bulk molecules, Fc and Fab glycans of HA-specific antibodies were largely concordant and included digalactosylated (G2) structures with increased sialylation and reduced bisection (Figure 3C-F, G-V) in the pregnant group, whereas agalactosylated, monosialylated and bisected structures were predominant in the non-pregnant group. Taken together, these results point to a distinct Fab and Fc glycan profile of antigen-specific antibodies produced during pregnancy consistent with distinct capacity for antigen-recognition (Fab) and finely modulated inflammatory properties (Fc).

To explore possible associations between Fab and Fc glycosylation, we performed correlation analyses between glycans of HA-specific antibodies in both groups (Figure 3W, X). Significant associations between specific glycan types were detected (Figure 3W, X), which suggest coordinated glycosylation of both Fab and Fc molecules. This was particularly evident in the non-pregnant group.

### **Antigen-specific non-neutralizing antibody functions are selectively affected by pregnancy**

Given the observed differences in magnitude and glycan composition of HA-specific antibodies during pregnancy, we next investigated their Fc mediated effector functions. Responses were measured independently for the two vaccine strains (H1 MI and H3 HK). Monocyte phagocytosis (ADCP) and complement deposition (ADCD) activity of H1 HA-specific antibodies were significantly

lower in pregnant women as compared to the non-pregnant women (**Figure 4B, C**). Intriguingly, no differences were seen in neutrophil phagocytosis (ADNP) and NK degranulation (**Figure 4A, D, E**). Both H1 HA- and H3 HA-specific antibodies in the pregnant group exhibited reduced cytotoxicity (ADCC) although it did not reach statistical significance (**Figure 4F**). Overall, a consistent trend towards reduced antibody functionality across FcR-dependent functions was observed in the pregnant women. The predominant changes on H1 HA-specific antibody function further supports pregnancy-associated impact on antigen-specific humoral immunity.

### **Multivariate signatures of antibodies during pregnancy**

To dissect the differences between antibodies in pregnant and non-pregnant women, a least absolute shrinkage and selection operator and LASSO Partial Least Squares Discriminant Analysis (LASSO-PLSDA) was conducted. This modeling technique allowed the determination of features that contributed most strongly to the group differences, and these predictors were then visualized on the PLSDA plot. This analysis included all the influenza-specific variables assessed (serum IgG, HAI and MN titers, glycosylation, Fc-effector functions, antibody subtypes Fc receptor binding), 79 in total. Readouts from pregnant and non-pregnant groups were separated and orthogonalized along LV1 (**Figure 5A**). The down-selected features were ranked by their importance in separating the pregnant and non-pregnant antibody profile (**Figure 5B**). The top predictor was H1 HA-specific antibody binding to Fc $\gamma$ R1, which was greatly enriched in pregnant women. Another predictor was the lower H1 HA-specific IgG titer in the pregnant group. The remaining predictors were mainly Fc and Fab glycan residues. The groups segregated in antigen-specific antibody galactosylation profiles; anti-inflammatory H3 HA Fc G1B and H1 HA Fc G2S2F glycans were preeminent in pregnant women whereas inflammatory H1 HA Fc-G1F/G1FB and H1 HA Fab-G0 dominated in the non-pregnant group. Thus, Fc glycosylation and Fc receptor binding were the primary driving forces in determining the model. Most of the parameters down-selected with VIP scores were H1MI HA-specific even though H1 MI, H1 CA, and



186 H3 HK HA-specific readouts were included in the model, reinforcing the notion of antigen dependency  
187 of pregnancy-induced antibody changes.

188

## 189 **In vivo retention of antibodies produced during pregnancy**

190 The distinct glycosylation of influenza antibodies in pregnant women begs the question of the  
191 purpose of such post-translational modifications, assuming it would ultimately confer some evolutionary  
192 advantage to support offspring's health. Our group had shown selective transfer of maternal antibodies  
193 with digalactosylated Fc-glycan (Jennewein et al. 2019). These antibodies preferentially bind the FcRn  
194 receptor, which not only mediates translocation of IgG across the placenta but also recycling. Thus, we  
195 hypothesized that the concomitant increased galactosylation and sialylation of influenza-specific  
196 antibodies in pregnant women could allow longer antibody persistence. To address this question, we  
197 conducted an adoptive transfer experiment. Pooled serum from both pregnant and non-pregnant  
198 women were administered to mice, and antibody levels measured in circulation (**Figure 6**). Despite  
199 starting at the same levels in the recipient mice, IgG from the pregnant group exhibited significantly  
200 higher retention in mouse circulation as compared to IgG from the non-pregnant group (**Figure 6**). This  
201 is consistent with the hypothesized prolonged persistence and reduced catabolism.

202

## 203 **Discussion**

204 Seasonal influenza vaccination during pregnancy is recommended by the Advisory Committee on  
205 Immunization Practices (Grohskopf et al. 2020) and the American College of Obstetricians and  
206 Gynecologists ("ACOG Committee Opinion No. 732: Influenza Vaccination During Pregnancy" 2018).  
207 The heightened susceptibility of pregnant women to severe influenza infection during the 2009 H1N1  
208 pandemic (Siston et al. 2010) brought attention to the importance of vaccination for protection of both  
209 mothers and newborns. There has been renewed interest, in recent years, in expanding maternal  
210 immunization against other pathogens (e.g., respiratory syncytial virus, cytomegalovirus, group B  
211 streptococcus, etc.) that are important causes of neonatal and infant death. This approach, however,

212 faces unique challenges. Fine-tuned regulatory mechanisms are deployed during pregnancy to balance  
 213 the tolerogenic environment necessary to avoid unhealthy reactions to paternal antigens with the need  
 214 to engage robust adaptive immunity against microbial threats (Mor and Cardenas 2010; Schumacher,  
 215 Costa, and Zenclussen 2014). Profound changes in humoral immunity occur during gestation, which  
 216 include decreased number of peripheral B cells (Watanabe et al. 1997; Faucette et al. 2015), and  
 217 increased IL-10-secreting regulatory B cells (Rolle et al. 2013). These changes are also expected to  
 218 impact vaccine-induced immunity.

219 In this study we report, for the first time, distinct binding and functional features of antibodies  
 220 specific for seasonal influenza vaccine strains produced during pregnancy. Among the most notable is  
 221 the overt reduction in total IgG and IgG subclasses specific for the H1 MI vaccine strain. HAI titers against  
 222 H1 CA – the original 2009 H1N1 pandemic strain, were also reduced and, alarmingly, below  
 223 seroprotective levels. Changes in antibody levels affected primarily those against H1 HA but not those  
 224 against H3 HA . This could be due to immune imprinting, since H1 CA-like viruses have continued to  
 225 circulate globally since the 2009 H1N1 pandemic (H1 MI is an antigenically drifted H1 CA-like virus) while  
 226 the subclade of predominant H3 virus has changed almost every other year (WHO ; Allen and Ross  
 227 2018). The history of prior influenza exposure of these women and pre-existing immunity are not known  
 228 and could have influenced the responses detected (Kosikova et al. 2018). Others have reported reduced  
 229 HA-specific IgG and IgG subclass responses, as well as HAI titers to seasonal influenza vaccines during  
 230 pregnancy (Schlaudecker et al. 2018; Schlaudecker et al. 2012; Bischoff et al. 2013). These studies had  
 231 access to pre-vaccination samples and reported no differences in basal antibody titers between pregnant  
 232 and non-pregnant women, and yet were able to detect similar reductions in post vaccine immunity,  
 233 suggesting that the antibody modulations we have observed are intrinsic of pregnancy.

234 Pregnant women had significantly lower IgG1/IgG and IgG3/IgG4 ratios in response to both H1  
 235 and H3 vaccine strains, which is consistent with a Th2-type shift of humoral immunity during gestation.  
 236 IgG1 and IgG3 are the main subclasses produced in response to viral antigens (Hjelholt et al. 2013),  
 237 hence their reduced proportions raise concerns about insufficient protection against viral infections.

In addition to lower IgG response to the H1 vaccine strain, pregnant women had reduced IgG titers against highly conserved group 1 and group 2 HA stem regions. This observation is new and suggests that production of stem-specific antibodies during pregnancy might be impaired and that these antibodies could be limited in their capacity to recognize emerging virus variants. Further studies to understand HA stem-specific immunity in this group are warranted as stem antibodies are hypothesized to confer broad cross-protection (Wu and Wilson 2017) and are candidate antigens for sought after universal flu vaccines (Sautto, Kirchenbaum, and Ross 2018).

Intriguingly, we found that H1 HA-specific IgG in pregnant women had higher avidity compared to those from non-pregnant women. In addition, HA-specific antibodies produced during pregnancy had increased capacity to bind Fc $\gamma$ R1. Fc $\gamma$ R1 is an activating receptor expressed in DC and monocyte/macrophages, with high affinity for human monomeric IgG, particularly IgG1 (Stewart et al. 2014; Bruhns et al. 2009). On the other hand, H1 HA-specific IgG from pregnant women had reduced binding capacity to Fc $\gamma$ RIIIa-V, a high affinity allotype expressed in monocytes/macrophages. The enhanced capacity of antibodies to bind cognate antigens and to selectively engage in innate cell function via Fc-interaction may represent compensatory mechanisms to maximize response yet avoid harmful effects.

Another novel aspect of our study was the analysis of extra-neutralizing FcR-mediated antibody functions in pregnant women. H1-specific ADCP, ADCD, and ADCC were reduced in this group, and this observation is consistent with reduced levels of H1 IgG, and in particular IgG1, which triggers these processes efficiently by engaging Fc $\gamma$ RI (Gunn and Alter 2016). The reduced capacity of H1 HA antibodies to bind to Fc $\gamma$ RIII-V, which is expressed in monocytes and macrophages might have also contributed to this outcome. IgG1 has been implicated in activation of complement in the context of influenza infection, hence reduced IgG1 in this group is consistent with lower C3 deposition.

Unlike FcR-mediated monocyte/macrophage uptake, neutrophil phagocytic activity and NK degranulation both appeared largely unaffected during pregnancy. Neutrophil phagocytosis can be

activated by different and additional signals such as IgG2 interaction with Fc $\gamma$ R1a and IgA with Fc $\alpha$ RI (Gunn and Alter 2016). NK degranulation was maintained in the pregnant group despite their antibodies exhibiting lower binding affinity for Fc $\gamma$ R1a (the cellular receptor that mediates NK degranulation). These observations further support the idea of compensatory mechanisms of the humoral immune system to offset pregnancy-intrinsic changes and maintain a healthy state.

Vastly different glycosylation of total and influenza-specific antibodies was observed in pregnant women compared to non-pregnant controls. The total Fc glycan profile in pregnant women, which included fucosylation and sialylation, was oriented towards reduced inflammation. In contrast, total Fab glycans, which involved increased fucosylation, agalactosylation, and bisection, were associated with increased inflammation. Non-inflammatory Fc galactosylation and sialylation as well as Fab N-acetylglucosamine bisection of bulk antibodies during pregnancy have been reported elsewhere (Bondt et al. 2014; Jansen et al. 2016; Bondt et al. 2016; Ruhaak et al. 2014; van de Geijn et al. 2009; Selman et al. 2012). Surprisingly, the Fc and Fab glycan profile of HA-specific antibodies were largely concordant within each group and included digalactosylated (G2) structures with increased sialylation and reduced bisection in the pregnant group, whereas agalactosylated, monosialylated, and bisected structures were predominant in the non-pregnant group. The association patterns remained broadly unchanged in the two groups, which indicates a coordinated global regulation of Fc and Fab glycosylation. However, other factors governing production of Fab and Fc glycans may reduce the overall level of coordination to reflect the putative greater level of Fab glycosylation during pregnancy (van de Bovenkamp et al. 2016).

Two distinct populations emerged in the PLSDA analysis, with Fc and Fab glycosylation being primary discriminatory elements; the clear separation of the two groups confirms the robustness of the data. The similarity in Fc and Fab glycosylation for the influenza-specific antibodies suggests some level of coordination of post-translational modifications in the Golgi that differs according to the B cell population. This is the first demonstration of Fab and Fc glycosylation of vaccine-specific antibodies

consistent with non-inflammatory activity in pregnant women and different from the more inflammatory pattern in the non-pregnant group. Despite the disparity in antibody glycosylation, all the relevant Fc-mediated influenza-specific cellular functions were detected in the pregnant group.

We have previously shown that digalactosylated antibodies involved in NK-degranulation were enriched in cord blood; these digalactosylated antibodies preferentially bind to the neonatal Fc receptor (FcRn), which transits antibodies across the placenta (Jennewein et al. 2019; Martinez et al. 2019). Digalactosylated antibodies are reportedly more effective at facilitating NK-degranulation, a function the neonatal immune system is better equipped to deploy as opposed to phagocytosis or other non-neutralizing functions (Jennewein et al. 2019). For the mother, digalactosylation of antibodies during gestation may reflect another compensatory mechanism that maintains ADNP unaltered when other cellular functions may be reduced. Likewise, sialylation has been exploited in immunoglobulin therapy to endow anti-inflammatory benefits (Anthony et al. 2008; Pagan, Kitaoka, and Anthony 2018; Bruckner et al. 2017). Here, enhanced Fc-sialylation during pregnancy may contribute to dampened antibody-mediated inflammation consistent with the tolerizing state of pregnancy (Pagan, Kitaoka, and Anthony 2018).

Lastly, serum antibodies from pregnant women were retained longer in mouse circulation as demonstrated in *in vivo* passive transfer experiments, suggesting that beyond impacting the inflammatory state, the biophysical changes described above, in particular concomitant increased galactosylation and sialylation (Bas et al. 2019) may be intended to ensure sufficient circulating antibody during gestation during extended periods for protection of both the mothers and newborns. Together, the shifts observed in influenza-specific antibodies during pregnancy are consistent with reduced inflammation, more efficient Fc receptor engagement to maintain anti-viral function (as the magnitude of antibody available might be reduced), enhancement of placental transfer, reduction in antibody catabolism, and enrichment of antibodies that are more efficient for the newborn. The origin, regulation, and evolution of these pregnancy-associated antibody changes remains to be investigated.

Rather than broad immune suppression during pregnancy (Memoli et al. 2013), our data suggest that humoral immunity is selectively modulated by changes in antibody levels, avidity, FcR binding capacity, glycosylation patterns, and innate cellular functions. Our results also argue against universally compromised humoral immunity and in favor of discrete, antigen-dependent modifications.

While our study is limited by a small sample size and the retrospective analysis of immune responses to influenza seasonal vaccine strains, it still provides a valuable snapshot of vaccine-specific immunity in the pregnant population. Maternal infections place women and their infants at high risk. Understanding pregnancy-associated changes in antibody production, post-translational modifications and function, as well as how these processes affect vaccine responses will benefit vaccine design and will inform the development of much needed preventive and therapeutic strategies, particularly those for use in emergency situations, to improve maternal and infant health.

## Acknowledgments

H. X. was supported by the fund of FDA Office of Women's Health.

## Author contributions:

Conceptualization, M.F.J., H.X., G.A., and M.F.P.; Clinical samples: M.F.P, W.H.C and J.D. C. Investigation; M.F.J., M.K., F.J.N., P.R., and C.M.B.; Resources, H.X., G.A., and M.F.P.; Writing-Original draft, M.F.J, H.X., G.A., and M.F.P.; Writing-review and editing, J.D.C, W.H.C.; Supervision, H.X., G.A., and M.F.P.

## Declaration of interests:

The authors have no competing interests to declare

## 337 **Figure Legends:**

338

### 339 **Figure 1: Pregnancy associated differences in influenza-specific antibody titer.**

340 HA-specific IgG **(A)**, group 1- and group 3-stem specific IgG **(B)**, hemagglutination inhibition (HAI) **(C)**,  
 341 microneutralization (MN) **(D)** and HA-specific IgG avidity **(E)** in pregnant and non-pregnant women.  
 342 Data represent log transformed individual datapoints and geometric mean titers (bars). ELISA, HAI and  
 343 MN titers were compared using one-tailed Mann-Whitney test. Avidity was evaluated using a two-tailed  
 344 Mann-Whitney test \* $p < 0.05$ , \*\* $p < 0.01$ .

345

### 346 **Figure 2: Pregnancy influences HA-specific IgG subclass and Fc receptor binding.**

347 IgG and IgG subclass levels and the Fc receptor binding were assessed by Luminex. **A-B.** Dot plots  
 348 depict the differences between isotype and subclass levels for non-pregnant (NP, grey circles) and  
 349 pregnant (P, blue circles) women. **A.** Isotypes. **B.** IgG subclasses. **C-D.** IgG1/IgG4 **(C)** IgG3/IgG4 ratios  
 350 **(D)**. **E-H.** Class 1 Fc receptor. **D.** Class 2 Fc receptors. **E.** Class 3 Fc receptors. **F.** Neonatal Fc receptor.  
 351 Statistics evaluated as Mann-Whitney test and stars represent differences between H1 and H3 response.  
 352 \* $p < 0.05$ , \*\* $p < 0.01$ , \*\*\* $p < 0.001$ , \*\*\*\* $p < 0.0001$ .

353

### 354 **Figure 3: Pregnancy alters antibody Fc and Fab glycosylation.**

355 Antibody glycosylation for HA-specific and bulk antibodies was analyzed by capillary electrophoresis.  
 356 **A-R.** Radar plots depicting different glycosylation profiles of bulk IgG Fc **(A)** and Fab **(B)**, H1-specific  
 357 IgG Fc **(C)** and Fab **(E)** and H3-specific IgG Fc **(D)** and Fab **(E)** in non-pregnant and pregnant groups.  
 358 G=galactose (0-2), F=fucose, B=Bisecting GlcNAc, S=sialic acid (1-2). **G-V.** These dot-line and  
 359 stacked-bar plots depict the differences in HA1-specific antibody Fc **(G-J)** and Fab **(O-R)** and HA3-  
 360 specific antibody Fc **(K-N)** and Fab **(S-V)** glycosylation between non-pregnant (NP) and pregnant (P)  
 361 women. **(W, X)** Heatmaps showing the spearman correlation between HA-specific Fab and Fc  
 362 glycosylation for pregnant **(W)** and non-pregnant **(X)** women. Significance for radar plots and  
 363 glycosylation determined by Mann-Whitney test. \* $p < 0.05$ , \*\* $p < 0.01$ , \*\*\* $p < 0.001$ , \*\*\*\* $p < 0.0001$ .

364

365 **Figure 4: Antigen-specific non-neutralizing antibody functions are affected by pregnancy.**

366 Influenza H1- and H3-specific antibody dependent neutrophil phagocytosis (ADNP) **(A)**, monocyte  
367 phagocytosis (ADCP) **(B)**, complement deposition (ADCD) **(C)**, NK degranulation measured as  
368 CD107a, MIP-1 $\beta$  and IFN $\gamma$  **(D, E)** and cellular cytotoxicity (ADCC) **(F)**. Groups were compared using  
369 two-tailed Mann-Whitney Test. \* $p < 0.05$ , \*\* $p < 0.01$ .

370

371 **Figure 5: Multivariate signatures of antibodies produced during pregnancy.**

372 Computational analysis was used to distinguish features enriched in pregnancy. **A.** LASSO Partial  
373 Least Squares Discriminant Analysis (LASSO-PLSDA) of influenza-specific antibody features between  
374 pregnant and non-pregnant women orthogonalized along latent variable 1 (LV1). LV1 explains 42.5% of  
375 the variance along the X axis while LV2 explained 17.1% of the variance. **B.** The Variable Importance in  
376 Projection (VIP) scores for the PLSDA indicate the prime factors driving the differences between  
377 pregnant and non-pregnant women. Factors pointing towards the left are enriched in non-pregnant  
378 samples, while those pointing right are enriched in pregnant samples. Bar color and length corresponds  
379 to relative importance. Antibody features are colored by category.

380

381 **Figure 6. In vivo antibody retention.**

382 The dot-line plot depicts the retention of IgG in mice injected with pooled plasma from pregnant (blue, 4  
383 mice) or non-pregnant (grey, 5 mice) mice. Retention was measured over a 6-day period. Dots are at  
384 mean with error bars at the standard deviation. Statistics evaluated using a two-way ANOVA. \* $p < 0.05$ ,  
385 \*\* $p < 0.01$ .

386

387 **Supplemental Figure 1: Relationship of antibody profiles and vaccination.**

388 PCA analysis was used to distinguish effects of vaccination. No differences were observed across the  
389 antibody profiles for vaccination and un-vaccinated participants. Principle component 1 (PC1) contains  
390 12% of the variance and PC2 contains 10.5% of the variance. **A.** Dots colored to distinguish pregnant  
391 (blue dots) and non-pregnant (grey dots) women. **B.** Dots colored to distinguish women who received  
392 seasonal influenza vaccine (pink dots) and women without clinical record of vaccination (orange dots).

393

394

395

396

397



# **Supplemental Table 1: Demographics of study participants**

|                                                     | <b>Non-pregnant</b>            | <b>Pregnant</b>                |
|-----------------------------------------------------|--------------------------------|--------------------------------|
| <b>Age</b>                                          | <b>31.35</b><br>(Range: 23-44) | <b>27.64</b><br>(Range: 18-35) |
| <b>Hormonal birth control</b>                       | <b>10:10</b><br>(yes: no)      | <b>N/A</b>                     |
| <b>Received flu vaccine</b>                         | <b>15:5</b><br>(yes:no record) | <b>11:3</b><br>(yes:no record) |
| <b>Received TDAP vaccine</b>                        | <b>0:20</b><br>(yes:no)        | <b>14:0</b><br>(yes:no)        |
| <b>Months between vaccine and sample collection</b> | <b>4.2</b><br>(Range: 0-6)     | <b>4.3</b><br>(Range:2-6)      |

402

## 403 **METHODS**

404 **Human samples.** Serum samples were obtained from pregnant (end of 3<sup>rd</sup> trimester) and non-pregnant  
 405 women who received egg-based inactivated influenza vaccine during the 2017-2018 flu season;  
 406 samples were obtained within 4 months of vaccination (**Supplemental table 1, Supplemental figure**  
 407 **1**). The vaccine components for the northern hemisphere 2017-2018 season influenza vaccine included  
 408 H1N1 A/Michigan/45/2015, H3N2 A/Hong Kong/4801/2014, B/Phuket/3073/2013, and  
 409 B/Brisbane/60/2008-like viruses((WHO) 2017). All subjects were HIV, HBV, and HCV negative and  
 410 provided written informed consent before enrollment. This study was approved by the University of  
 411 Maryland, Baltimore Institutional Review Board (HP-00065842 and HP-00040025) and by Partners  
 412 Human Research Committee (Approval Number 2018P001060).

413

414 **Cell lines.** Madin-Darby canine kidney-SIAT1 cells (SIAT1-MDCK, Sigma Aldrich, St. Louis, MO, USA),  
 415 were grown in MEM plus 50 µg/ml of G418, 5% fetal bovine serum, 1X GlutaMAX™ and  
 416 penicillin/streptomycin. THP-1 cells (ATCC, Manassas, VA, USA), were grown in R10 (RPMI plus 10%  
 417 FBS L-glutamine and penicillin/streptomycin) supplemented with 0.01% β-mercaptoethanol.

418

419 **Viruses.** H1N1 A/California/07/2009 (H1 CA), H1N1 A/Michigan/45/2015 (H1 MI), and H3N2 A/Hong  
 420 Kong/4801/2014 (H3 HK) were grown in 9-10 day old embryonated eggs. Infectious viral titer, i.e., 50%  
 421 tissue culture infectious dose (TCID50), was determined using a nucleoprotein-based enzyme-linked  
 422 immunosorbent assay (ELISA) (Kosikova et al. 2018).

423

424 **Recombinant proteins.** For titer and avidity determination, genes coding H3 HK HA, chimeric HA  
 425 bearing H1 A/Puerto Rico/8/1934 stalk (group 1) with mismatched H16 HA head and chimeric HA  
 426 bearing H3 HK stalk (group 2) with mismatched H4 HA head were synthesized as previously described

(Stevens et al. 2004; Pica et al. 2012; Radvak et al. 2021) and were subcloned into the pFastBac gp67 vector (GenScript, Nanjing, China). Recombinant H3 HK HA, chimeric group 1 or group 2 stalk proteins expressed in Sf9 cells were column purified (GenScript). For functional assays and luminex Fc receptor binding and titer, recombinant H1 MI (HA $\Delta$ TM H1N1 A/Michigan/45/2015), H1 CA (HA $\Delta$ TM A/California/07/2009) and H3 HK proteins (H3 $\Delta$ TM H3N2 A/Hong Kong/4801/2014) expressed in 293 cells were purchased from Immune Technology Corp. (New York, NY, USA).

**Anti-HA ELISA and avidity.** HA-specific ELISA and avidity assays were performed as described (Kosikova et al. 2018). Briefly, serum samples were serially diluted and added to MaxiSorp microtiter plates (ThermoFisher) coated with 0.2  $\mu$ g/mL of recombinant protein. Plates were incubated at room temperature for 60 min. For avidity determination, antigen-antibody complexes were dissociated by incubation with 100  $\mu$ l of 4 M urea for 15 minutes and plates blocked again for an additional hour (Kosikova et al. 2018). Bound antibodies were detected by addition of horseradish peroxidase-labeled goat-anti-human IgG (Invitrogen, Carlsbad, CA, USA) followed by 1-Step Ultra TMB (ThermoFisher) substrate. Absorbance at 450 nm was measured in a Victor V multilabel reader (PerkinElmer, Waltham, MA, USA). Antibody titers were determined by interpolation in a Sigmoidal four parameter logistic regression curve. Avidity index was calculated based on the area of the entire antibody titration curve as described previously (Kosikova et al. 2018).

**Hemagglutination inhibition (HAI).** Sera were pre-treated with receptor-destroying enzyme (RDE) (Denka-Seiken, Tokyo, Japan), serially diluted two-fold (starting at 1:10) and incubated with 4 HA units per 25  $\mu$ l of viruses at room temperature for 30 min. Hemagglutination was determined using 0.5% turkey red blood cells for H1N1 viruses or 0.75% guinea pig red blood cells in the presence of 20 nM oseltamivir for H3N2 viruses as described previously (Xie et al. 2015; Xie et al. 2011). HAI titers were expressed as the reciprocal of the highest serum dilution that resulted in complete HAI. A titer of 5 was

assigned if no inhibition was observed at the starting dilution.

**Microneutralization (MN).** H1N1 and H3N2-specific MN titers were determined using a nucleoprotein-based ELISA as previously described (Kosikova et al. 2018). Briefly, RDE-treated sera were incubated with 100 50% tissue culture infectious dose (TCID<sub>50</sub>) of virus for 1 h at room temperature, 5% CO<sub>2</sub>, and then overlaid onto SIAT1-MDCK cells (Sigma) overnight. Infected cells were detected using influenza A nucleoprotein-specific monoclonal antibodies (Millipore, Burlington, MA, USA). MN titers were reported as the reciprocal of the highest serum dilution with ≥50% neutralization.

**Phagocytosis.** The antibody-dependent monocyte phagocytosis assay (ADCP) used was adapted from Ackerman et al. 2011 and the antibody-dependent neutrophil phagocytosis assay (ADNP) was performed as described (Karsten et al. 2019). Briefly, influenza antigens, recombinant HAΔTM H1N1 A/Michigan/45/2015 and HAΔTM H3N2 A/Hong Kong/4801/2014 were biotinylated with a 20-fold excess of 10 mM EZ-Link NHS-LC-biotin (ThermoFisher) and unbound biotin was removed using a Zeba Spin Desalting Column (ThermoFisher). Antigens were then mixed with yellow-green fluorescent NeutrAvidin microspheres (ThermoFisher) at a ratio of 10 μl of beads per 10 μg of biotinylated protein and incubated at 37°C, 5% CO<sub>2</sub> for 2 hours. Following incubation, beads were washed twice with PBS-0.01% BSA and resuspended in 1 mL of PBS-0.01% BSA. Serum samples were diluted 1:10, 1:50, and 1:100 in PBS, and 10 μl of each dilution was mixed with 10 μl of antigen-coupled fluorescent beads in a 96-well round bottom plate and incubated at 37°C, 5% CO<sub>2</sub>, for 2 h. The beads were then washed with 200 μl of PBS. For the monocyte phagocytosis, THP-1 cells (2.5×10<sup>4</sup> cells in 200 μl per well) were added to wells containing the beads, and plates were incubated for 16 h at 37°C, 5% CO<sub>2</sub>. For the neutrophil phagocytosis, fresh neutrophils were isolated from whole blood of healthy adults and added (5×10<sup>5</sup> cells in 200 μl) to bead-containing wells. Plates were incubated for 1h at 37°C, 5% CO<sub>2</sub>. Following incubation, cells were spun down and stained with anti-CD66b (clone:G10F5, BioLegend,

477 Dedham, MA, USA) for 15 min. For both assays, cells were fixed with 100 µl of 4% paraformaldehyde  
 478 (PFA) for 10 min, resuspended in 50 µl of PBS and analyzed by Flow cytometry using an iQue  
 479 Screener PLUS (IntelliCyt, Albuquerque, NM, USA) and ForeCyt software (IntelliCyt). Influenza-specific  
 480 IgG and PBS were included as positive and negative controls. Phagocytosis scores were calculated as  
 481 the percentage of bead positive cells, multiplied by the geometric mean fluorescent intensity of the  
 482 beads for bead positive cells, divided by  $1 \times 10^7$ . All reported values are the area under the curve of the  
 483 mean of two replicates.

484

485 **Complement deposition.** Antibody-dependent complement deposition (ADCD) was performed as  
 486 previously described (Fischinger et al. 2019). Biotinylated recombinant HAΔTM H1N1  
 487 A/Michigan/45/2015 and H3ΔTM H3N2 A/Hong Kong/4801/2014 were coupled to red fluorescent  
 488 NeutrAvidin microspheres (ThermoFisher), incubated with sera and added to single wells as described  
 489 above. Lyophilized guinea pig complement (Cedarlane, Burlington, ON, Canada) was resuspended in  
 490 ice-cold water and diluted 1:100 in cold veronal buffer supplemented with 0.1% fish skin gelatin (Boston  
 491 Bio Products, Boston, MA, USA). 200 µl of diluted complement was added to each well, and plates  
 492 were incubated for 20 min at 37°C, 5% CO<sub>2</sub>. Plates were then washed twice with ice-cold 15 mM  
 493 EDTA-PBS and stained with anti-guinea pig C3-FITC (MP Biomedical, Santa Ana, CA, USA). After a  
 494 final wash, beads were re-suspended in 50 µl of PBS and analyzed on the iQue Screener PLUS. Red-  
 495 fluorescent beads were gated based on size. Complement deposition was determined as the geometric  
 496 mean fluorescent intensity of red fluorescence of the beads divided by 1,000. Data presented is area  
 497 under the curve of the complement score averaged for two replicates.

498

499 **NK cell Activation.** ELISA plates were coated with recombinant HAΔTM H1N1 A/Michigan/45/2015 and  
 500 H3ΔTM H3N2 A/Hong Kong/4801/2014 at 3 µg/mL of PBS for 2 h at 37°C, 5% CO<sub>2</sub>. Plates were then  
 501 washed three times with PBS and blocked overnight with 200 µl of 5% BSA in PBS. The next day, plates

were washed, and samples were added in three serial dilutions (1:10, 1:50, 1:100) in a 50  $\mu$ l volume and incubated 2 h at 37°C, 5% CO<sub>2</sub>. NK cells were isolated from healthy adult PBMC using a RosetteSep NK Cell Enrichment Kit (Stem Cell Technologies, Vancouver, BC, Canada), according to manufacturer's instructions followed by density gradient centrifugation in Histopaque. A suspension of  $1.5 \times 10^6$  cells/ml in R10 was prepared, supplemented with 1 ng/ml rhIL15 and incubated overnight at 37°C, 5% CO<sub>2</sub>. Prior to the assay, a suspension of  $2.5 \times 10^5$  cells/ml was prepared and 2.5  $\mu$ g/ml of Brefeldin A (Biolegend) and Golgistop (BD Biosciences, Franklin Lake, NJ, USA) and 2.5  $\mu$ l of anti-CD107a (Clone:555802, BD Biosciences) were added. NK cells ( $5 \times 10^4$  in 200 $\mu$ l) were added to each well containing Ag-Ab, and plates were incubated for 5 h at 37°C, 5% CO<sub>2</sub>. Following the incubation and washing, cells were stained with anti-CD3 (Clone:UCHT, BD Biosciences), anti-CD56 (Clone: B159, BD biosciences), and anti-CD16 (Clone: 3G8, BD biosciences), washed, fixed, permeabilized with FIX&Perm kit (ThermoFisher), and stained intracellularly with anti-IFN $\gamma$  (Clone:B27, BD biosciences) and MIP-1 $\beta$  (Clone:D21-1351, BD Biosciences). Cells were resuspended in PBS and analyzed on the iQue Screener as described above. Influenza-specific IgG and PBS (diluent) were included as positive and negative controls. Negative control wells were used to set gates. Data was reported as the percentage of CD16+CD56+CD3- NK cells positive for CD107a, IFN $\gamma$ , or MIP-1 $\beta$  and is the area under the curve of the mean of three replicates divided by 100,000.

**Cellular cytotoxicity.** Antibody-dependent cellular cytotoxicity (ADCC) assay was performed as previously described (Jacobsen et al. 2017) with modifications. Briefly, SIAT1-MDCK cells were seeded onto 96-well white flat-bottom plates (PerkinElmer), infected with H1 MI or H3 HK viruses and incubated for 6 h at 37°C. RDE-treated sera (25  $\mu$ l/well) and Jurkat effector cells (Promega, Madison, WI, USA) (25  $\mu$ l/well) were added to infected cells and incubated overnight at 37°C. Bio-Glo luciferase assay reagent (Promega) was then added, and luminescence was measured using a Victor V multilabel reader (PerkinElmer).

527

528 **Antibody subclass and FcR binding.** IgG, IgA, IgM, and Fc receptor binding analyses were  
 529 performed using a multiplex luminex assay as previously described (Brown et al. 2012). Briefly,  
 530 recombinant HAΔTM H1N1 A/Michigan/45/2015 and H3ΔTM H3N2 A/Hong Kong/4801/2014 were  
 531 coupled to MagPlex microspheres (Luminex corporation, Austin, TX, USA) at a ratio of 25 µg of protein  
 532 to 400 µl of beads. Microspheres were activated with 100 mM monobasic sodium phosphate pH 6.2 in  
 533 the presence of 50 mg/mL EDC and 50 mg/ml sulfo-NHS, washed with 0.05 M 2[N-  
 534 Morpholino]ethanesulfonic acid (MES) pH 5.0, incubated with antigen for 2 h at 37°C, 5% CO<sub>2</sub>, and  
 535 blocked with PBS-TBN (0.1% BSA, 0.02% tween-20, 0.05% Azide in PBS, pH 7.4) for 30 min. The  
 536 beads were washed in PBS-0.05% tween-20, resuspended in 250 µl of PBS. Beads were added to  
 537 384-well plates and incubated with sera at a final 1:500 dilution in luminex wash buffer (PBS-0.05%  
 538 BSA-0.001% tween-20) for 2 h at room temperature and with shaking (800 rpm).

539 To detect antibody subclasses, following incubation, beads were washed in luminex buffer and  
 540 incubated with PE-labeled anti-IgG, -IgG1, -IgG2, -IgG3, -IgG4, -IgA1, -IgA2, and -IgM (Southern  
 541 Biotech, Birmingham, AL, USA) for 1 h at room temperature with shaking. After washing, beads were  
 542 resuspended in Qsol buffer (IntelliCyt) and plates were read on an iQue Screener PLUS. H1N1 and  
 543 H3N2 coupled beads were distinguished based on size and granularity, and data were analyzed as  
 544 median fluorescent intensity of PE for each bead population.

545 To investigate Fc receptor binding recombinant Fc receptors with an AviTag were biotinylated using  
 546 a Bir500 kit (Avidity, Aurora, CO, USA) according to manufacturer's instructions and purified using a Zeba  
 547 Spin Desalting Column. Biotin-labeled FcRs were then incubated with streptavidin-PE (Prozyme,  
 548 Hayward, CA, USA) for 10 min and excess streptavidin was quenched with 20 µM biotin (Avidity) for  
 549 another 10 min. Following bead and serum incubation, PE-Fc receptors were then added and incubated  
 550 for a further 1 h at room temperature with shaking. Plates were then washed and analyzed on an iQue  
 551 Screener as described above. Data reported for each sample represents the mean of two replicates.

552

553 **Glycosylation analysis.** Antigen-specific glycosylation analysis was performed as described in  
 554 Jennewein et al. 2019. Briefly, recombinant HAΔTM H1N1 A/Michigan/45/2015 and H3ΔTM H3N2  
 555 A/Hong Kong/4801/2014 were biotinylated and coupled to streptavidin magnetic beads (New England  
 556 Biolabs) at a ratio of 2.5 µg of protein to 25 µl of beads. Sera (200 µl) were first incubated with non-  
 557 coated NeutrAvidin beads to remove non-specific binding and then added to the antigen-coated beads  
 558 and incubated for 1 h at 37°C. Antibodies were eluted by incubation in 50 µl of pH 2.9 citrate buffer for  
 559 30 min at 37°C. Samples were then spun down and the eluted antibodies, contained in the supernatant,  
 560 were neutralized with 30 µl pH 8.9 potassium phosphate buffer. Antibodies were then coupled to  
 561 protein G beads (New England Biolabs). After beads were washed, IDEZ was used to cleave the Fab  
 562 (in the supernatant) from the Fc (remained on the magnetic beads) (New England Biolabs) for 1 h at  
 563 37°C and collected. The two fragments were deglycosylated and fluorescently labeled using a  
 564 GlycanAssure APTS kit (ThermoFisher scientific) according to manufacturer's instructions. For the Fc  
 565 fragment, which remained bound to the protein G beads, an additional magnetic separation after  
 566 PNGase glycan cleavage separated the glycans from remaining magnetic beads and the protocol then  
 567 proceeded per manufacturer's instructions. Glycans were analyzed on a 3500xL genetic analyzer.  
 568 Glycan fucosyl and afucosyl libraries (Prozyme) were used to assign 24 discrete glycan peaks using  
 569 GlycanAssure software (ThermoFisher). Data are reported as percentages of total glycans for each of  
 570 the glycan peaks.

571

572 **In vivo Ab retention.** Pooled sera from pregnant and non-pregnant women were transferred  
 573 intraperitoneally into naïve female Balb/c mice (Charles River, Wilmington, MA) at 0.2 ml/mouse. The  
 574 circulating concentration of human IgG after passive transfer was measured by a Human IgG Easy  
 575 Quantification ELISA Kit (Cell Sciences, Newburyport, MA). A human IgG calibrated standard was  
 576 included for calculation of IgG content.



577 **Statistical Analysis.** Mann-Whitney test (univariate analysis) was used to examine differences in  
578 readouts between pregnant and non-pregnant groups. P values are two-sided, \* $p < 0.05$ , \*\* $p < 0.01$ ,  
579 \*\*\* $p < 0.001$ , and \*\*\*\* $p < 0.0001$ . Data on radar plots were z-score normalized individually along each  
580 radar to an average of 0 with a standard deviation of 1. Multivariate Principal Component  
581 Analysis (PCA) and Least absolute shrinkage and selection operator LASSO Partial Least Squares  
582 Discriminant Analysis (LASSO-PLSDA) were used to distinguish pregnant vs. non-pregnant immune  
583 profiles. LASSO is a regression analysis that selects variables that contribute to the differences  
584 between samples arranged along an ordinal dependent variable. It selects features that are required to  
585 create a maximum separation which are then visualized on the PLSDA plot. Missing values were  
586 imputed using the k-nearest neighbor. Variables were centered and scaled to a standard deviation of 1.  
587 PCA was used to visualize if pregnant and non-pregnant samples separate into discrete groups within  
588 the two-dimensional principal component (PC) space. The LASSO-PLSDA model had a calibration  
589 success of 100% with a leave-1-out CV success of 97.0588%. Univariate analysis was performed with  
590 Prism 7 (GraphPad, San Diego, CA). MATLAB was used to perform all multivariate analysis.

591

592

## References

- World Health Organization. 2017. "Recommended composition of influenza virus vaccines for use in the 2017-2018 northern hemisphere influenza season." In. Gneva.
- ACIP. 2013. "Updated Recommendations for Use of Tetanus Toxoid, Reduced Diphtheria Toxoid, and Acellular Pertussis Vaccine (Tdap) in Pregnant Women." In, 131-35. Morbidity and Mortality Weekly Report: CDC.
- Ackerman, M. E., B. Moldt, R. T. Wyatt, A. S. Dugast, E. McAndrew, S. Tsoukas, S. Jost, C. T. Berger, G. Sciaranghella, Q. Liu, D. J. Irvine, D. R. Burton, and G. Alter. 2011. 'A robust, high-throughput assay to determine the phagocytic activity of clinical antibody samples', *J Immunol Methods*, 366: 8-19.
- 'ACOG Committee Opinion No. 732: Influenza Vaccination During Pregnancy'. 2018. *Obstet Gynecol*, 131: e109-e14.
- Allen, J. D., and T. M. Ross. 2018. 'H3N2 influenza viruses in humans: Viral mechanisms, evolution, and evaluation', *Hum Vaccin Immunother*, 14: 1840-47.
- Anthony, R. M., F. Nimmerjahn, D. J. Ashline, V. N. Reinhold, J. C. Paulson, and J. V. Ravetch. 2008. 'Recapitulation of IVIG anti-inflammatory activity with a recombinant IgG Fc', *Science*, 320: 373-6.
- Barrero-Castillero, A., K. S. Beam, L. B. Bernardini, E. G. C. Ramos, P. E. Davenport, A. R. Duncan, Y. S. Fraiman, L. C. Frazer, H. Healy, E. M. Herzberg, M. L. Keyes, K. T. Leeman, K. Leone, J. C. Levin, M. Lin, R. M. Raju, A. Sullivan, and Covid-Working Group Harvard Neonatal-Perinatal Fellowship. 2020. 'COVID-19: neonatal-perinatal perspectives', *J Perinatol*.
- Bischoff, A. L., N. V. Folsgaard, C. G. Carson, J. Stokholm, L. Pedersen, M. Holmberg, A. Bisgaard, S. Birch, T. F. Tsai, and H. Bisgaard. 2013. 'Altered response to A(H1N1)pnd09 vaccination in pregnant women: a single blinded randomized controlled trial', *PLoS One*, 8: e56700.
- Bondt, A., Y. Rombouts, M. H. Selman, P. J. Hensbergen, K. R. Reiding, J. M. Hazes, R. J. Dolhain, and M. Wuhler. 2014. 'Immunoglobulin G (IgG) Fab glycosylation analysis using a new mass spectrometric high-throughput profiling method reveals pregnancy-associated changes', *Mol Cell Proteomics*, 13: 3029-39.
- Bondt, A., M. H. Selman, A. M. Deelder, J. M. Hazes, S. P. Willemsen, M. Wuhler, and R. J. Dolhain. 2013. 'Association between galactosylation of immunoglobulin G and improvement of rheumatoid arthritis during pregnancy is independent of sialylation', *J Proteome Res*, 12: 4522-31.
- Bondt, A., M. Wuhler, T. M. Kuijper, J. M. Hazes, and R. J. Dolhain. 2016. 'Fab glycosylation of immunoglobulin G does not associate with improvement of rheumatoid arthritis during pregnancy', *Arthritis Res Ther*, 18: 274.
- Brown, E. P., A. F. Licht, A. S. Dugast, I. Choi, C. Bailey-Kellogg, G. Alter, and M. E. Ackerman. 2012. 'High-throughput, multiplexed IgG subclassing of antigen-specific antibodies from clinical samples', *J Immunol Methods*, 386: 117-23.
- Bruckner, C., C. Lehmann, D. Dudziak, and F. Nimmerjahn. 2017. 'Sweet SIGNs: IgG glycosylation leads the way in IVIG-mediated resolution of inflammation', *Int Immunol*, 29: 499-509.

630 Bruhns, P., B. Iannascoli, P. England, D. A. Mancardi, N. Fernandez, S. Jorieux, and M. Daeron. 2009.  
631 'Specificity and affinity of human Fcγ receptors and their polymorphic variants for human IgG  
632 subclasses', *Blood*, 113: 3716-25.

633 Einarsson, H. K., M. H. Selman, R. Kapur, S. Scherjon, C. A. Koeleman, A. M. Deelder, C. E. van der  
634 Schoot, G. Vidarsson, and M. Wuhler. 2013. 'Comparison of the Fc glycosylation of fetal and maternal  
635 immunoglobulin G', *Glycoconj J*, 30: 147-57.

636 Faucett, Azure N., Benjamin L. Unger, Bernard Gonik, and Kang Chen. 2015. 'Maternal vaccination:  
637 moving the science forward', *Human Reproduction Update*, 21: 119-35.

638 Fiore, A. E., T. M. Uyeki, K. Broder, L. Finelli, G. L. Euler, J. A. Singleton, J. K. Iskander, P. M. Wortley,  
639 D. K. Shay, J. S. Bresee, N. J. Cox, Control Centers for Disease, and Prevention. 2010. 'Prevention and  
640 control of influenza with vaccines: recommendations of the Advisory Committee on Immunization  
641 Practices (ACIP), 2010', *MMWR Recomm Rep*, 59: 1-62.

642 Fischinger, S., J. K. Fallon, A. R. Michell, T. Broge, T. J. Suscovich, H. Streeck, and G. Alter. 2019. 'A  
643 high-throughput, bead-based, antigen-specific assay to assess the ability of antibodies to induce  
644 complement activation', *J Immunol Methods*, 473: 112630.

645 Forsyth, K., S. Plotkin, T. Tan, and C. H. Wirsing von Konig. 2015. 'Strategies to decrease pertussis  
646 transmission to infants', *Pediatrics*, 135: e1475-82.

647 Grohskopf, L. A., E. Alyanak, K. R. Broder, L. H. Blanton, A. M. Fry, D. B. Jernigan, and R. L. Atmar.  
648 2020. 'Prevention and Control of Seasonal Influenza with Vaccines: Recommendations of the Advisory  
649 Committee on Immunization Practices - United States, 2020-21 Influenza Season', *MMWR Recomm  
650 Rep*, 69: 1-24.

651 Gunn, B. M., and G. Alter. 2016. 'Modulating Antibody Functionality in Infectious Disease and  
652 Vaccination', *Trends Mol Med*, 22: 969-82.

653 Hjelholt, A., G. Christiansen, U. S. Sorensen, and S. Birkelund. 2013. 'IgG subclass profiles in normal  
654 human sera of antibodies specific to five kinds of microbial antigens', *Pathog Dis*, 67: 206-13.

655 Huygen, K., R. N. Cabore, K. Maertens, P. Van Damme, and E. Leuridan. 2015. 'Humoral and cell  
656 mediated immune responses to a pertussis containing vaccine in pregnant and nonpregnant women',  
657 *Vaccine*, 33: 4117-23.

658 Jacobsen, H., M. Rajendran, A. Choi, H. Sjursen, K. A. Brokstad, R. J. Cox, P. Palese, F. Krammer, and  
659 R. Nachbagauer. 2017. 'Influenza Virus Hemagglutinin Stalk-Specific Antibodies in Human Serum are a  
660 Surrogate Marker for In Vivo Protection in a Serum Transfer Mouse Challenge Model', *MBio*, 8.

661 Jamieson, D. J., M. A. Honein, S. A. Rasmussen, J. L. Williams, D. L. Swerdlow, M. S. Biggerstaff, S.  
662 Lindstrom, J. K. Louie, C. M. Christ, S. R. Bohm, V. P. Fonseca, K. A. Ritger, D. J. Kuhles, P. Eggers, H.  
663 Bruce, H. A. Davidson, E. Lutterloh, M. L. Harris, C. Burke, N. Cocoros, L. Finelli, K. F. MacFarlane, B. Shu,  
664 S. J. Olsen, and A. Pregnancy Working Group Novel Influenza. 2009. 'H1N1 2009 influenza virus  
665 infection during pregnancy in the USA', *Lancet*, 374: 451-8.

666 Jansen, B. C., A. Bondt, K. R. Reiding, E. Lonardi, C. J. de Jong, D. Falck, G. S. Kammeijer, R. J. Dolhain,  
667 Y. Rombouts, and M. Wuhrer. 2016. 'Pregnancy-associated serum N-glycome changes studied by high-  
668 throughput MALDI-TOF-MS', *Sci Rep*, 6: 23296.

669 Jennewein, M. F., I. Goldfarb, S. Dolatshahi, C. Cosgrove, F. J. Noelette, M. Krykbaeva, J. Das, A.  
670 Sarkar, M. J. Gorman, S. Fischinger, C. M. Boudreau, J. Brown, J. H. Cooperrider, J. Aneja, T. J.  
671 Suscovich, B. S. Graham, G. M. Lauer, T. Goetghebuer, A. Marchant, D. Lauffenburger, A. Y. Kim, L. E.  
672 Riley, and G. Alter. 2019. 'Fc Glycan-Mediated Regulation of Placental Antibody Transfer', *Cell*.

673 Karsten, C. B., N. Mehta, S. A. Shin, T. J. Diefenbach, M. D. Slein, W. Karpinski, E. B. Irvine, T. Broge,  
674 T. J. Suscovich, and G. Alter. 2019. 'A versatile high-throughput assay to characterize antibody-  
675 mediated neutrophil phagocytosis', *J Immunol Methods*, 471: 46-56.

676 Kosikova, M., L. Li, P. Radvak, Z. Ye, X. F. Wan, and H. Xie. 2018. 'Imprinting of Repeated Influenza  
677 A/H3 Exposures on Antibody Quantity and Antibody Quality: Implications for Seasonal Vaccine Strain  
678 Selection and Vaccine Performance', *Clin Infect Dis*, 67: 1523-32.

679 Kourtis, A. P., J. S. Read, and D. J. Jamieson. 2014. 'Pregnancy and infection', *N Engl J Med*, 370:  
680 2211-8.

681 Kraus, T. A., S. M. Engel, R. S. Sperling, L. Kellerman, Y. Lo, S. Wallenstein, M. M. Escribese, J. L.  
682 Garrido, T. Singh, M. Loubeau, and T. M. Moran. 2012. 'Characterizing the pregnancy immune  
683 phenotype: results of the viral immunity and pregnancy (VIP) study', *J Clin Immunol*, 32: 300-11.

684 Kraus, T. A., R. S. Sperling, S. M. Engel, Y. Lo, L. Kellerman, T. Singh, M. Loubeau, Y. Ge, J. L. Garrido,  
685 M. Rodriguez-Garcia, and T. M. Moran. 2010. 'Peripheral blood cytokine profiling during pregnancy and  
686 post-partum periods', *Am J Reprod Immunol*, 64: 411-26.

687 Louie, J. K., M. Acosta, D. J. Jamieson, M. A. Honein, and Group California Pandemic Working. 2010.  
688 'Severe 2009 H1N1 influenza in pregnant and postpartum women in California', *N Engl J Med*, 362: 27-  
689 35.

690 Martinez, D. R., Y. Fong, S. H. Li, F. Yang, M. F. Jennewein, J. A. Weiner, E. A. Harrell, J. F. Mangold, R.  
691 Goswami, G. R. Seage, 3rd, G. Alter, M. E. Ackerman, X. Peng, G. G. Fouda, and S. R. Permar. 2019. 'Fc  
692 Characteristics Mediate Selective Placental Transfer of IgG in HIV-Infected Women', *Cell*.

693 Memoli, M. J., H. Harvey, D. M. Morens, and J. K. Taubenberger. 2013. 'Influenza in pregnancy',  
694 *Influenza Other Respir Viruses*, 7: 1033-9.

695 Monath, T. P., and A. Nasidi. 1993. 'Should yellow fever vaccine be included in the expanded  
696 program of immunization in Africa? A cost-effectiveness analysis for Nigeria', *Am J Trop Med Hyg*, 48:  
697 274-99.

698 Mor, G., and I. Cardenas. 2010. 'The immune system in pregnancy: a unique complexity', *Am J*  
699 *Reprod Immunol*, 63: 425-33.

700 Munoz, F. M., S. M. Patel, L. A. Jackson, G. K. Swamy, K. M. Edwards, S. E. Frey, C. R. Petrie, E. A.  
701 Sendra, and W. A. Keitel. 2020. 'Safety and immunogenicity of three seasonal inactivated influenza  
702 vaccines among pregnant women and antibody persistence in their infants', *Vaccine*, 38: 5355-63.

Ohfuji, S., M. Deguchi, D. Tachibana, M. Koyama, T. Takagi, T. Yoshioka, A. Urae, K. Ito, T. Kase, A. Maeda, K. Kondo, W. Fukushima, Y. Hirota, and Group Osaka Pregnant Women Influenza Study. 2018. 'Protective Effect of Maternal Influenza Vaccination on Influenza in Their Infants: A Prospective Cohort Study', *J Infect Dis*, 217: 878-86.

Pagan, J. D., M. Kitaoka, and R. M. Anthony. 2018. 'Engineered Sialylation of Pathogenic Antibodies In Vivo Attenuates Autoimmune Disease', *Cell*, 172: 564-77 e13.

Pica, N., R. Hai, F. Krammer, T. T. Wang, J. Maamary, D. Eggink, G. S. Tan, J. C. Krause, T. Moran, C. R. Stein, D. Banach, J. Wrammert, R. B. Belshe, A. Garcia-Sastre, and P. Palese. 2012. 'Hemagglutinin stalk antibodies elicited by the 2009 pandemic influenza virus as a mechanism for the extinction of seasonal H1N1 viruses', *Proc Natl Acad Sci U S A*, 109: 2573-8.

Radvak, P., M. Kosikova, Y. C. Kuo, X. Li, R. Garner, F. Schmeisser, I. Kosik, Z. Ye, J. P. Weir, J. W. Yewdell, and H. Xie. 2021. 'Highly pathogenic avian influenza A/Guangdong/17SF003/2016 is immunogenic and induces cross-protection against antigenically divergent H7N9 viruses', *NPJ Vaccines*, 6: 30.

Regan, A. K., N. de Klerk, H. C. Moore, S. B. Omer, G. Shellam, and P. V. Effler. 2016. 'Effect of Maternal Influenza Vaccination on Hospitalization for Respiratory Infections in Newborns: A Retrospective Cohort Study', *Pediatr Infect Dis J*, 35: 1097-103.

Rolle, L., M. Memarzadeh Tehran, A. Morell-Garcia, Y. Raeva, A. Schumacher, R. Hartig, S. D. Costa, F. Jensen, and A. C. Zenclussen. 2013. 'Cutting edge: IL-10-producing regulatory B cells in early human pregnancy', *Am J Reprod Immunol*, 70: 448-53.

Ruhaak, L. R., H. W. Uh, A. M. Deelder, R. E. Dolhain, and M. Wuhler. 2014. 'Total plasma N-glycome changes during pregnancy', *J Proteome Res*, 13: 1657-68.

Safety, Global Advisory Committee on Vaccine. 2014. "Safety and immunization during pregnancy." In.: World Health Organization.

Saso, A., and B. Kampmann. 2020. 'Maternal Immunization: Nature Meets Nurture', *Front Microbiol*, 11: 1499.

Sautto, G. A., G. A. Kirchenbaum, and T. M. Ross. 2018. 'Towards a universal influenza vaccine: different approaches for one goal', *Virology*, 15: 17.

Schlaudecker, E. P., L. Ambroggio, M. M. McNeal, F. D. Finkelman, and S. S. Way. 2018. 'Declining responsiveness to influenza vaccination with progression of human pregnancy', *Vaccine*, 36: 4734-41.

Schlaudecker, E. P., M. M. McNeal, C. N. Dodd, J. B. Ranz, and M. C. Steinhoff. 2012. 'Pregnancy modifies the antibody response to trivalent influenza immunization', *J Infect Dis*, 206: 1670-3.

Schumacher, A., S. D. Costa, and A. C. Zenclussen. 2014. 'Endocrine factors modulating immune responses in pregnancy', *Front Immunol*, 5: 196.

Selman, M. H., S. E. de Jong, D. Soonawala, F. P. Kroon, A. A. Adegika, A. M. Deelder, C. H. Hokke, M. Yazdanbakhsh, and M. Wuhler. 2012. 'Changes in antigen-specific IgG1 Fc N-glycosylation upon influenza and tetanus vaccination', *Mol Cell Proteomics*, 11: M111.014563.

740 Siston, A. M., S. A. Rasmussen, M. A. Honein, A. M. Fry, K. Seib, W. M. Callaghan, J. Louie, T. J. Doyle,  
741 M. Crockett, R. Lynfield, Z. Moore, C. Wiedeman, M. Anand, L. Tabony, C. F. Nielsen, K. Waller, S. Page,  
742 J. M. Thompson, C. Avery, C. B. Springs, T. Jones, J. L. Williams, K. Newsome, L. Finelli, D. J. Jamieson,  
743 and H. N. Influenza in Pregnancy Working Group Pandemic. 2010. 'Pandemic 2009 influenza A(H1N1)  
744 virus illness among pregnant women in the United States', *JAMA*, 303: 1517-25.

745 Sperling, R. S., S. M. Engel, S. Wallenstein, T. A. Kraus, J. Garrido, T. Singh, L. Kellerman, and T. M.  
746 Moran. 2012. 'Immunogenicity of trivalent inactivated influenza vaccination received during pregnancy  
747 or postpartum', *Obstet Gynecol*, 119: 631-9.

748 Stevens, J., A. L. Corper, C. F. Basler, J. K. Taubenberger, P. Palese, and I. A. Wilson. 2004. 'Structure  
749 of the uncleaved human H1 hemagglutinin from the extinct 1918 influenza virus', *Science*, 303: 1866-  
750 70.

751 Stewart, Ross, Scott A. Hammond, Michael Oberst, and Robert W. Wilkinson. 2014. 'The role of Fc  
752 gamma receptors in the activity of immunomodulatory antibodies for cancer', *Journal for*  
753 *ImmunoTherapy of Cancer*, 2: 29.

754 Thompson, M. G., J. C. Kwong, A. K. Regan, M. A. Katz, S. J. Drews, E. Azziz-Baumgartner, N. P. Klein,  
755 H. Chung, P. V. Effler, B. S. Feldman, K. Simmonds, B. E. Wyant, F. S. Dawood, M. L. Jackson, D. B. Fell,  
756 A. Levy, N. Barda, L. W. Svenson, R. V. Fink, S. W. Ball, A. Naleway, and Prevent Workgroup. 2019.  
757 'Influenza Vaccine Effectiveness in Preventing Influenza-associated Hospitalizations During Pregnancy:  
758 A Multi-country Retrospective Test Negative Design Study, 2010-2016', *Clin Infect Dis*, 68: 1444-53.

759 van de Bovenkamp, F. S., L. Hafkenscheid, T. Rispens, and Y. Rombouts. 2016. 'The Emerging  
760 Importance of IgG Fab Glycosylation in Immunity', *J Immunol*, 196: 1435-41.

761 van de Geijn, F. E., M. Wuhler, M. H. Selman, S. P. Willemsen, Y. A. de Man, A. M. Deelder, J. M.  
762 Hazes, and R. J. Dolhain. 2009. 'Immunoglobulin G galactosylation and sialylation are associated with  
763 pregnancy-induced improvement of rheumatoid arthritis and the postpartum flare: results from a large  
764 prospective cohort study', *Arthritis Res Ther*, 11: R193.

765 Vojtek, I., I. Dieussaert, T. M. Doherty, V. Franck, L. Hanssens, J. Miller, R. Bekkat-Berkani, W.  
766 Kandeil, D. Prado-Cohrs, and A. Vyse. 2018. 'Maternal immunization: where are we now and how to  
767 move forward?', *Ann Med*, 50: 193-208.

768 Watanabe, M., Y. Iwatani, T. Kaneda, Y. Hidaka, N. Mitsuda, Y. Morimoto, and N. Amino. 1997.  
769 'Changes in T, B, and NK lymphocyte subsets during and after normal pregnancy',  
770 *Am.J.Reprod.Immunol.*, 37: 368-77.

771 WHO. 'WHO recommendations on the composition of influenza virus vaccines', Accessed March  
772 23rd. <https://www.who.int/influenza/vaccines/virus/recommendations/en/>.

773 Wu, N. C., and I. A. Wilson. 2017. 'A Perspective on the Structural and Functional Constraints for  
774 Immune Evasion: Insights from Influenza Virus', *J Mol Biol*, 429: 2694-709.

775 Xie, H., X. Jing, X. Li, Z. Lin, E. Plant, O. Zoueva, H. Yang, and Z. Ye. 2011. 'Immunogenicity and cross-  
776 reactivity of 2009-2010 inactivated seasonal influenza vaccine in US adults and elderly', *PLoS One*, 6:  
777 e16650.



778 Xie, H., X. F. Wan, Z. Ye, E. P. Plant, Y. Zhao, Y. Xu, X. Li, C. Finch, N. Zhao, T. Kawano, O. Zoueva, M. J.  
779 Chiang, X. Jing, Z. Lin, A. Zhang, and Y. Zhu. 2015. 'H3N2 Mismatch of 2014-15 Northern Hemisphere  
780 Influenza Vaccines and Head-to-head Comparison between Human and Ferret Antisera derived  
781 Antigenic Maps', *Sci Rep*, 5: 15279.

782 Yee, J., W. Kim, J. M. Han, H. Y. Yoon, N. Lee, K. E. Lee, and H. S. Gwak. 2020. 'Clinical manifestations  
783 and perinatal outcomes of pregnant women with COVID-19: a systematic review and meta-analysis',  
784 *Sci Rep*, 10: 18126.

785 Zambrano, L. D., S. Ellington, P. Strid, R. R. Galang, T. Oduyebo, V. T. Tong, K. R. Woodworth, J. F.  
786 Nahabedian, 3rd, E. Azziz-Baumgartner, S. M. Gilboa, D. Meaney-Delman, Cdc Covid- Response  
787 Pregnancy, and Team Infant Linked Outcomes. 2020. 'Update: Characteristics of Symptomatic Women  
788 of Reproductive Age with Laboratory-Confirmed SARS-CoV-2 Infection by Pregnancy Status - United  
789 States, January 22-October 3, 2020', *MMWR Morb Mortal Wkly Rep*, 69: 1641-47.

790  
791

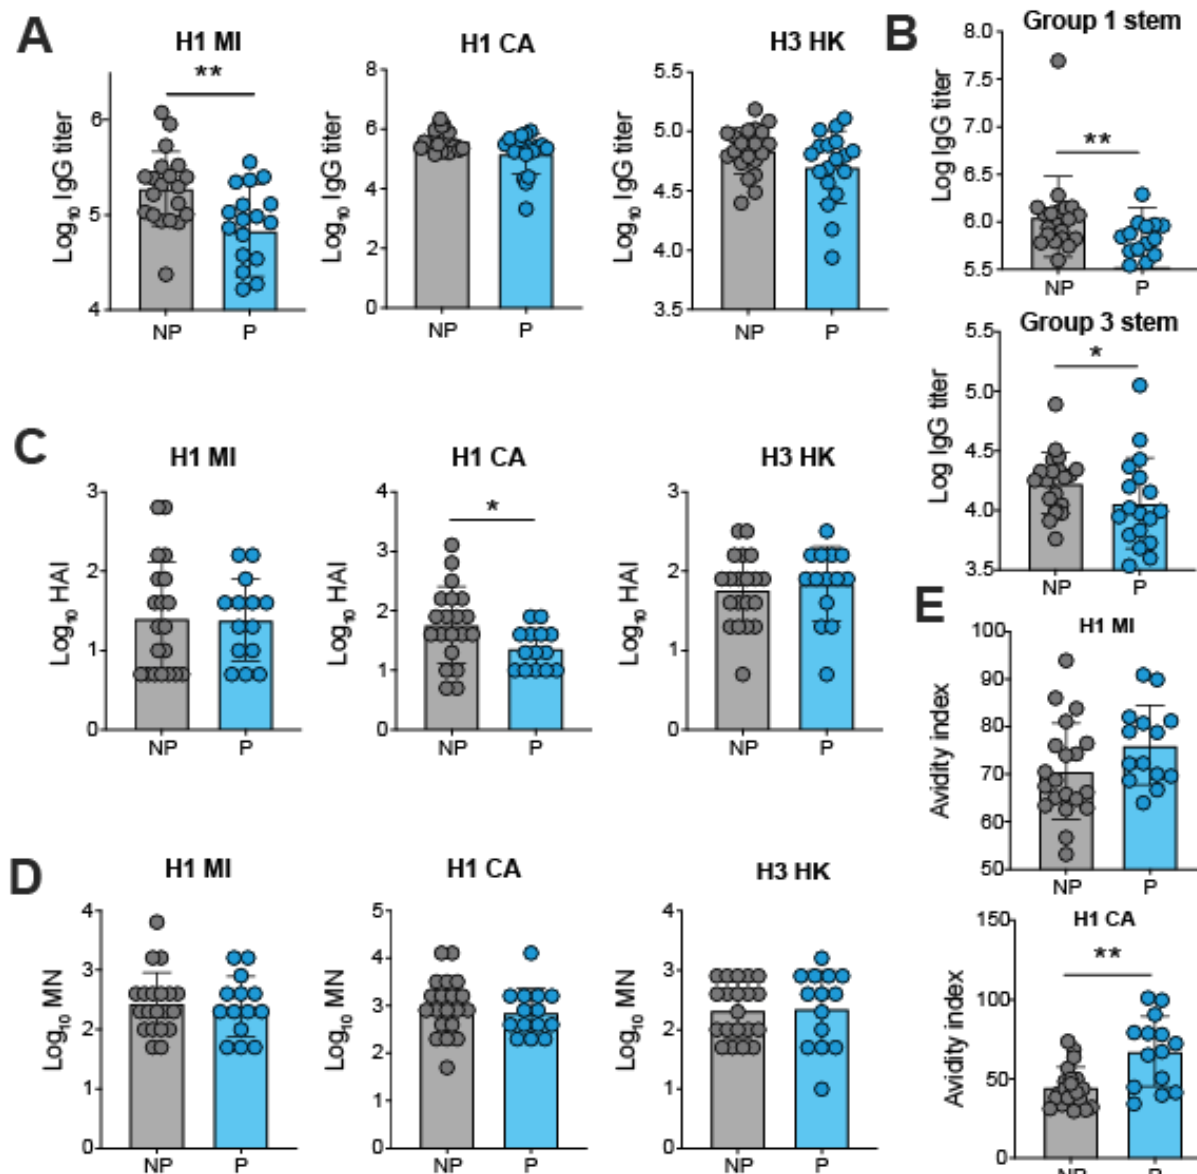

**Figure 1: Pregnancy associated differences in influenza-specific antibody titer.**

HA-specific IgG (**A**), group 1- and group 3-stem specific IgG (**B**), hemagglutination inhibition (HAI) (**C**), microneutralization (MN) (**D**) and HA-specific IgG avidity (**E**) in pregnant and non-pregnant women.

Data represent log transformed individual datapoints and geometric mean titers (bars). ELISA, HAI and MN titers were compared using one-tailed Mann-Whitney test. Avidity was evaluated using a two-tailed Mann-Whitney test \* $p < 0.05$ , \*\* $p < 0.01$ .



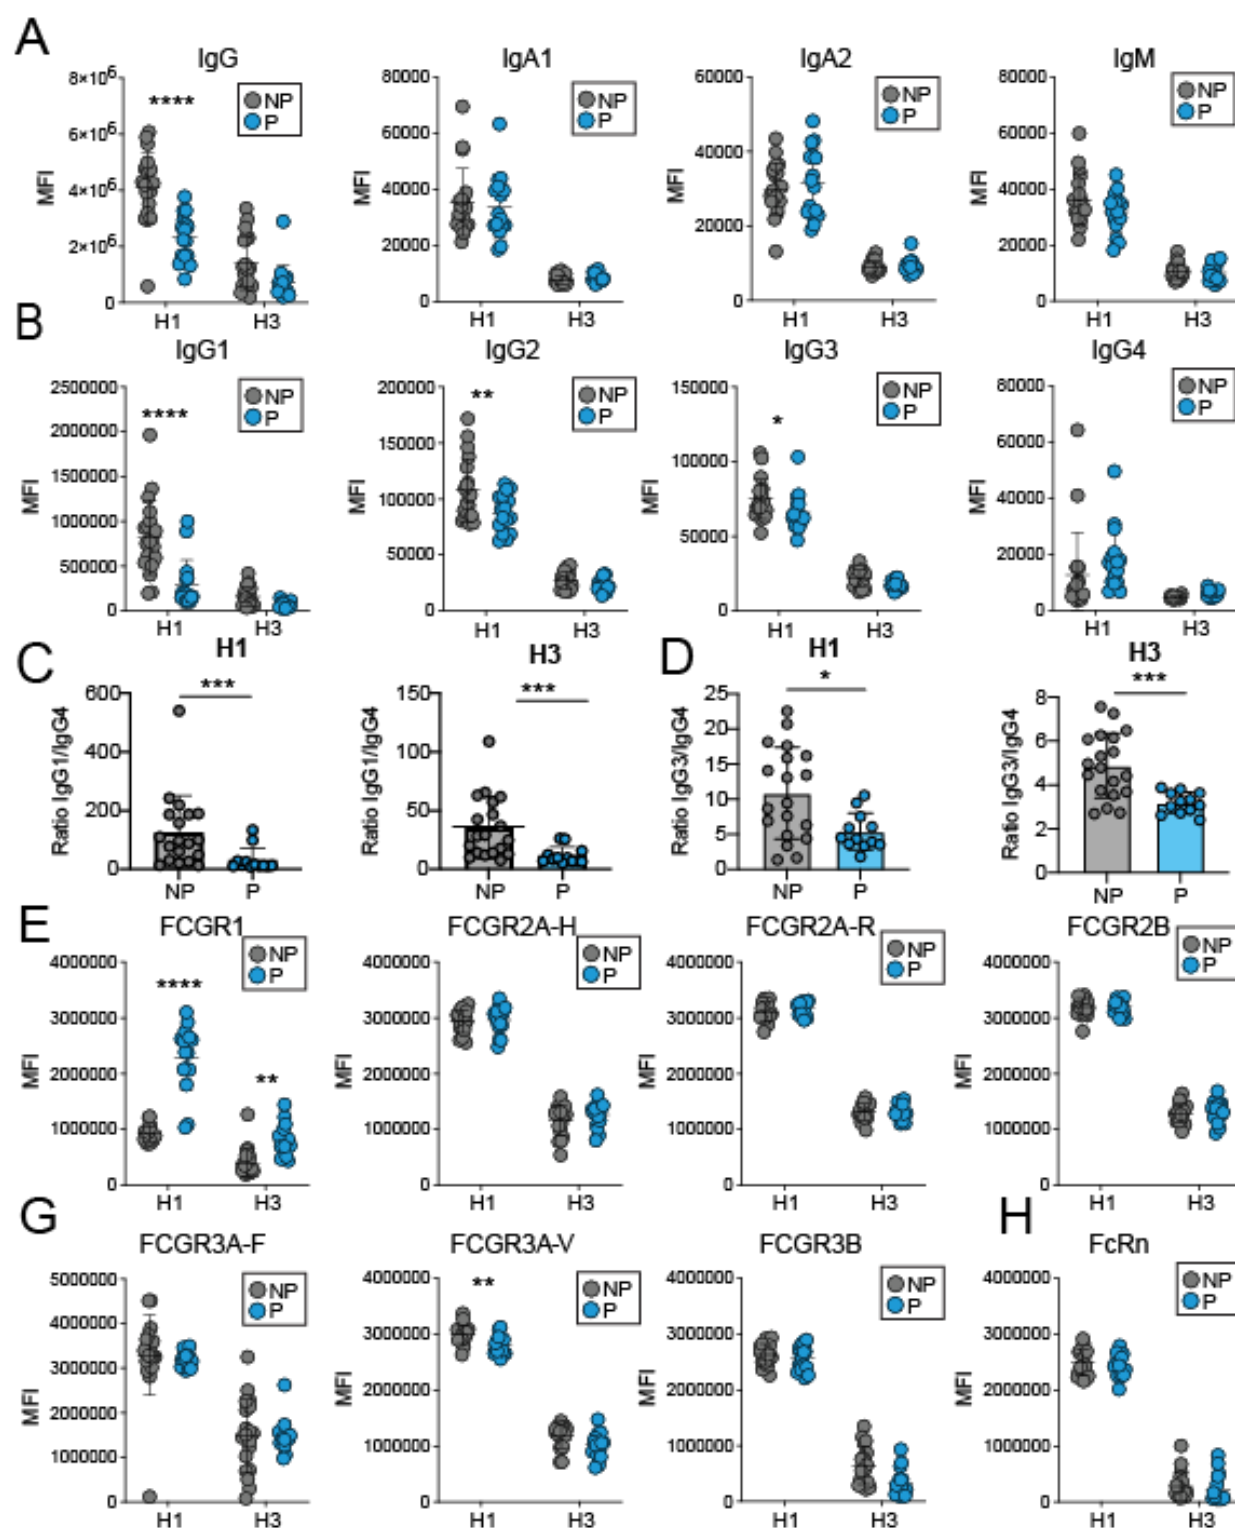

801  
802  
803  
804

805 **Figure 2: Pregnancy influences HA-specific IgG subclass and Fc receptor binding.**  
806 IgG and IgG subclass levels and the Fc receptor binding were assessed by luminex. **A-B.** Dot plots depict  
807 the differences between isotype and subclass levels for non-pregnant (NP, grey circles) and pregnant (P,  
808 blue circles) women. **A.** Isotypes. **B.** IgG subclasses. **C-D.** IgG1/IgG4 (**C**) IgG3/IgG4 ratios (D). **E-H.**  
809 Class 1 Fc receptor. **D.** Class 2 Fc receptors. **E.** Class 3 Fc receptors. **F.** Neonatal Fc receptor. Statistics  
810 evaluated as Mann-Whitney test and stars represent differences between H1 and H3 response. \*p<0.05,  
811 \*\*p<0.01, \*\*\*p<0.001, \*\*\*\*p<0.0001.  
812

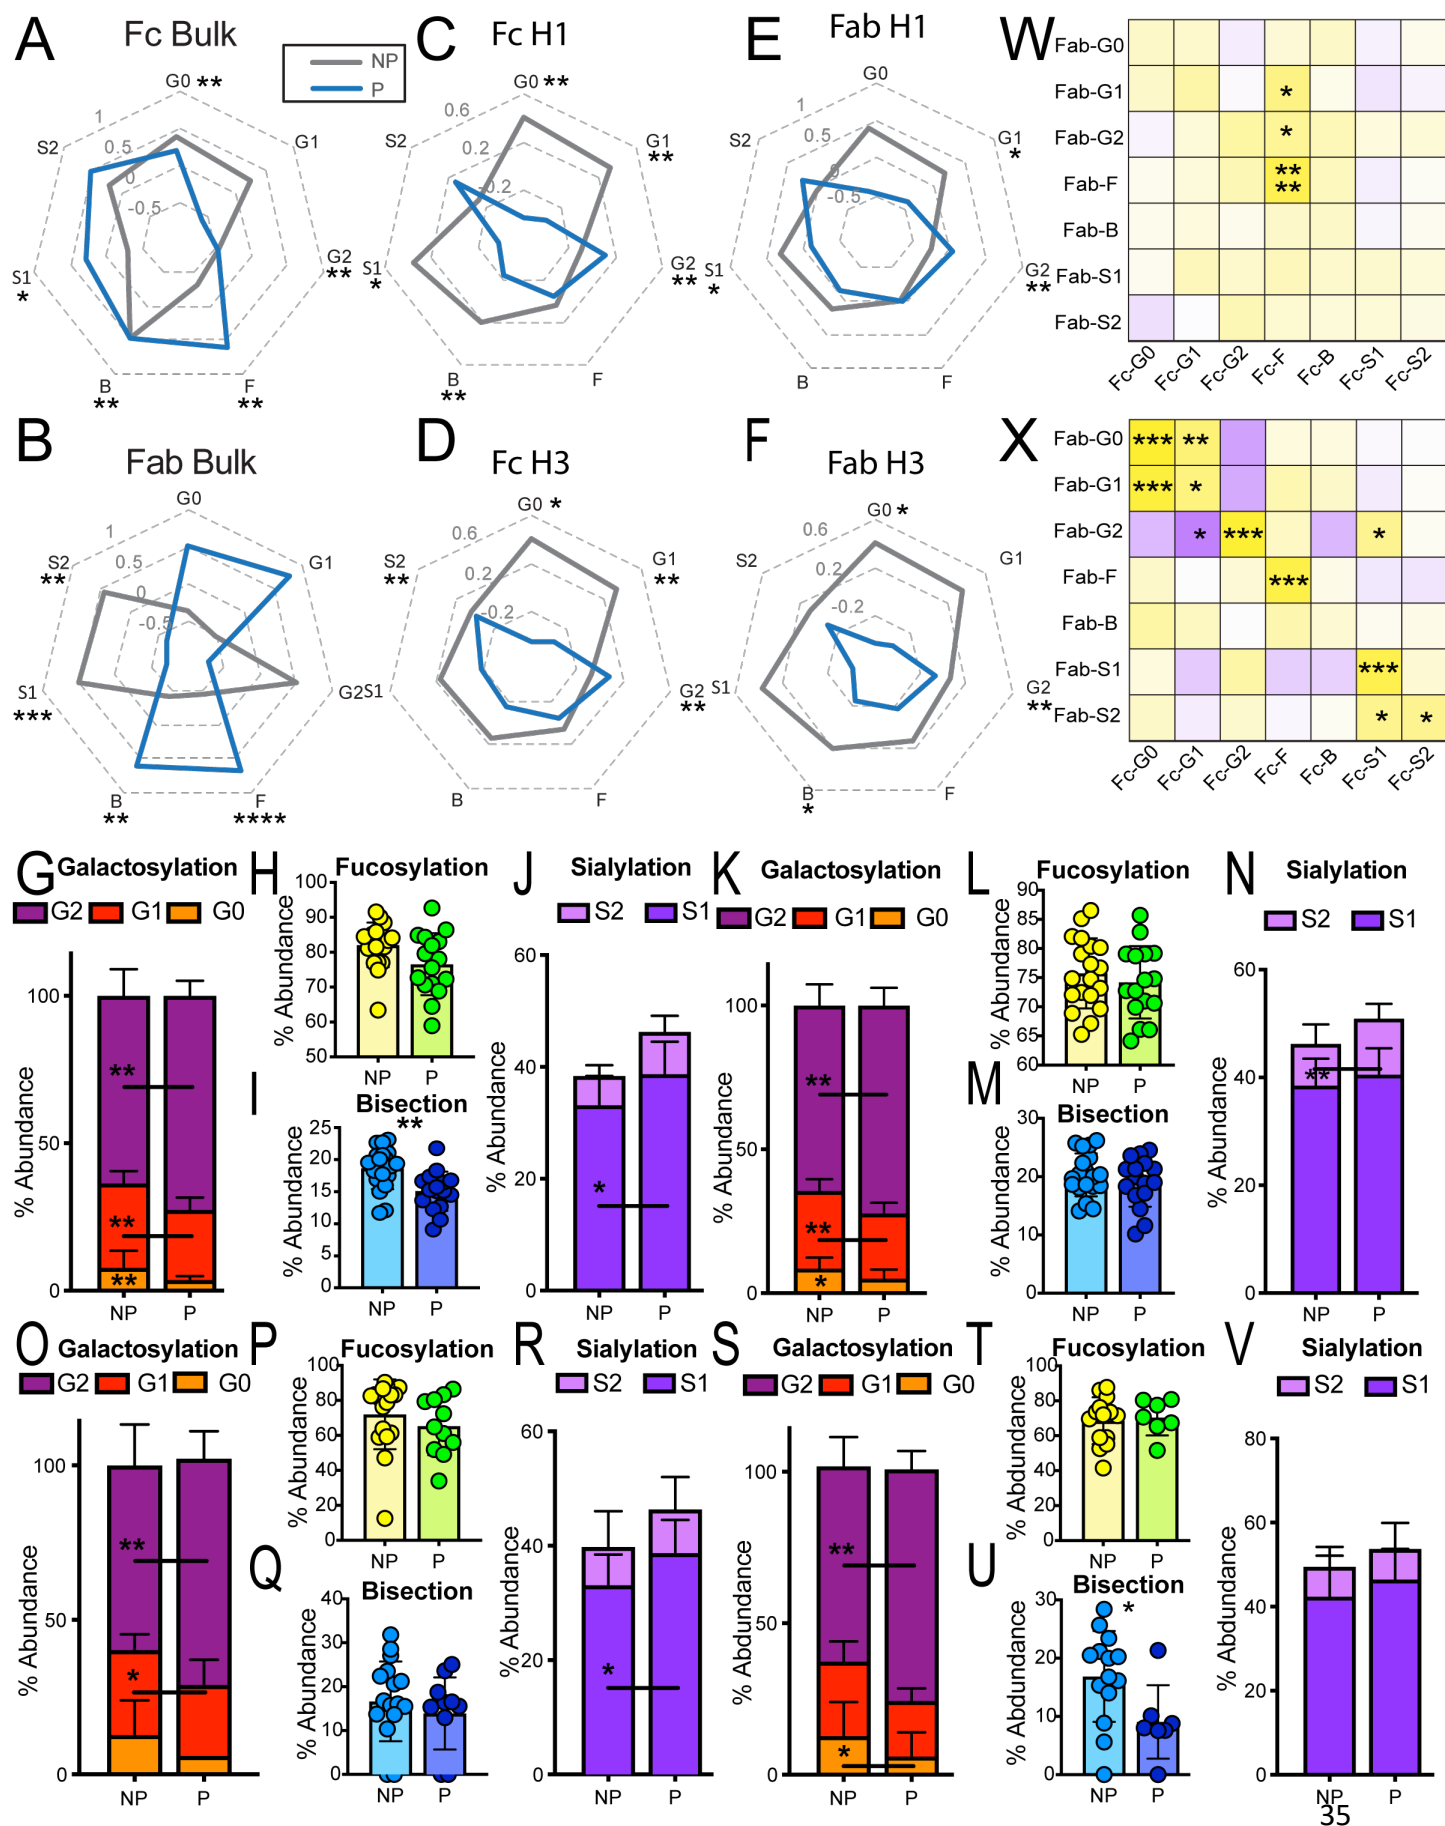

814  
815 **Figure 3: Pregnancy alters antibody Fc and Fab glycosylation.**

816 Antibody glycosylation for HA-specific and bulk antibodies was analyzed by capillary electrophoresis.  
817 **A-R.** Radar plots depicting different glycosylation profiles of bulk IgG Fc (**A**) and Fab (**B**), H1-specific  
818 IgG Fc (**C**) and Fab (**E**) and H3-specific IgG Fc (**D**) and Fab (**E**) in non-pregnant and pregnant groups.  
819 G=galactose (0-2), F=fucose, B=Bisecting GlcNAc, S=sialic acid (1-2). **G-V.** These dot-line and  
820 stacked-bar plots depict the differences in HA1-specific antibody Fc (**G-J**) and Fab (**O-R**) and HA3-  
821 specific antibody Fc (**K-N**) and Fab (**S-V**) glycosylation between non-pregnant (NP) and pregnant (P)  
822 women. (**W, X**) Heatmaps showing the spearman correlation between HA-specific Fab and Fc  
823 glycosylation for pregnant (**W**) and non-pregnant (**X**) women. Significance for radar plots and  
824 glycosylation determined by Mann-Whitney test. \*p<0.05, \*\*p<0.01, \*\*\*p<0.001, \*\*\*\*p<0.0001.  
825

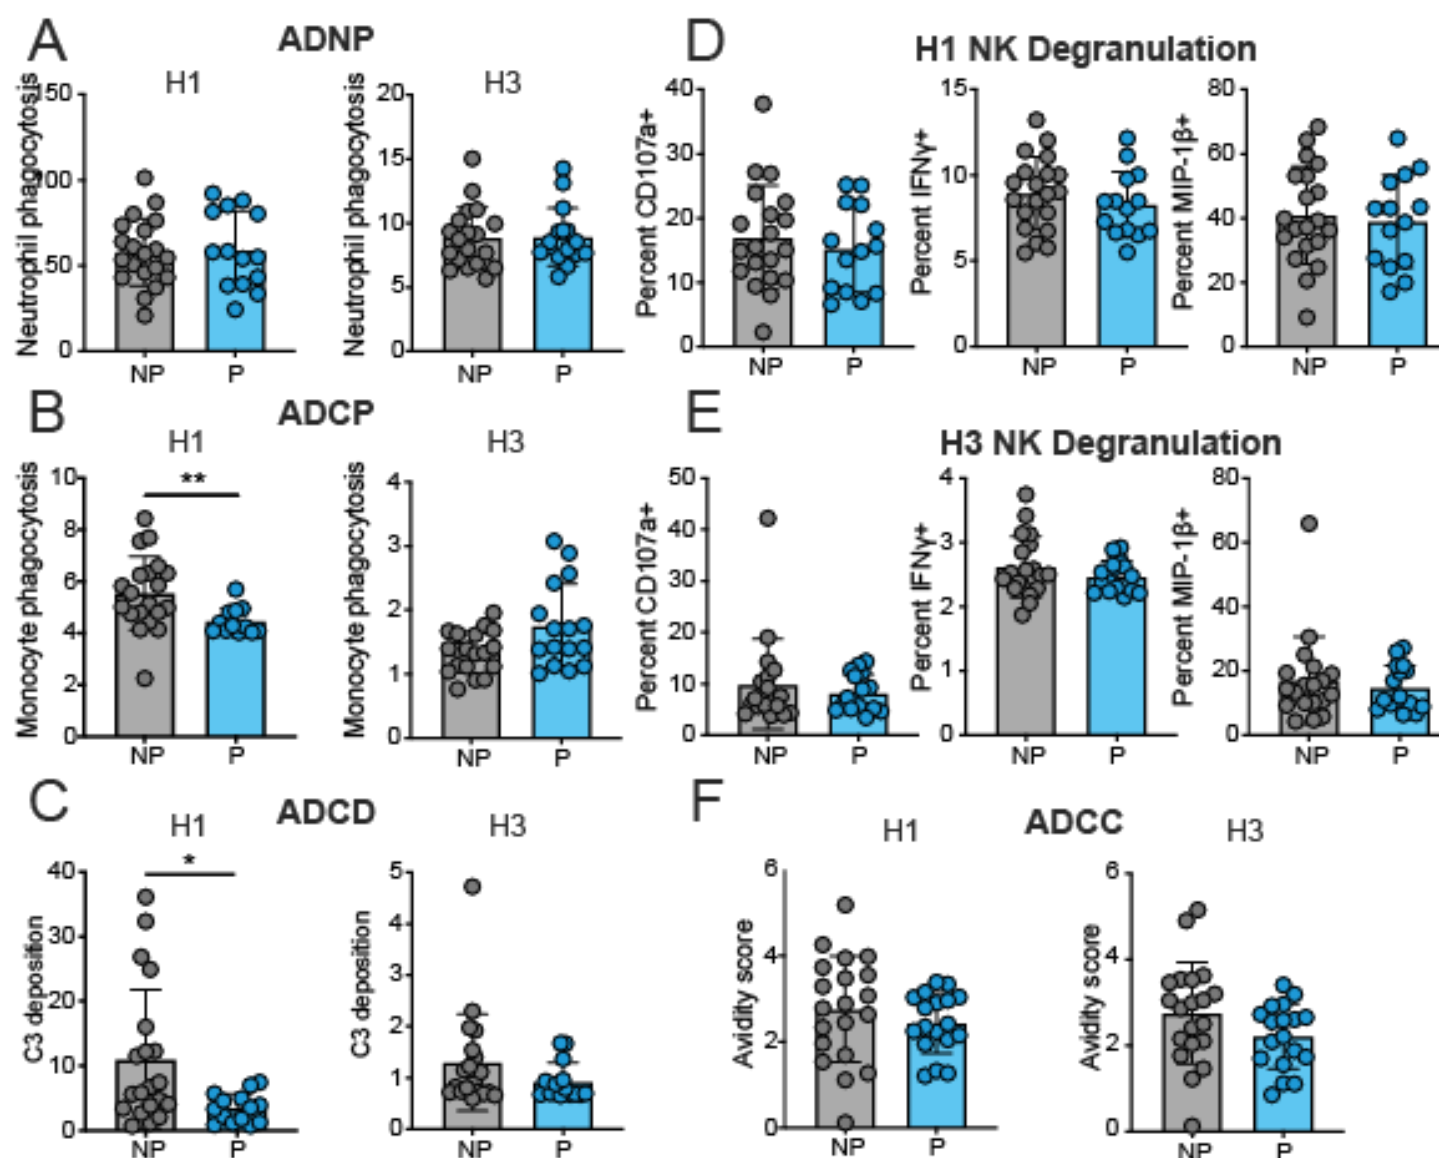

**Figure 4: Antigen-specific non-neutralizing antibody functions are affected by pregnancy.**

Influenza H1- and H3-specific antibody dependent neutrophil phagocytosis (ADNP) (A), monocyte phagocytosis (ADCP) (B), complement deposition (ADCD) (C), NK degranulation measured as CD107a, MIP-1 $\beta$  and IFN $\gamma$  (D, E) and cellular cytotoxicity (ADCC) (F). Groups were compared using two-tailed Mann-Whitney Test. \*p<0.05, \*\*p<0.01.

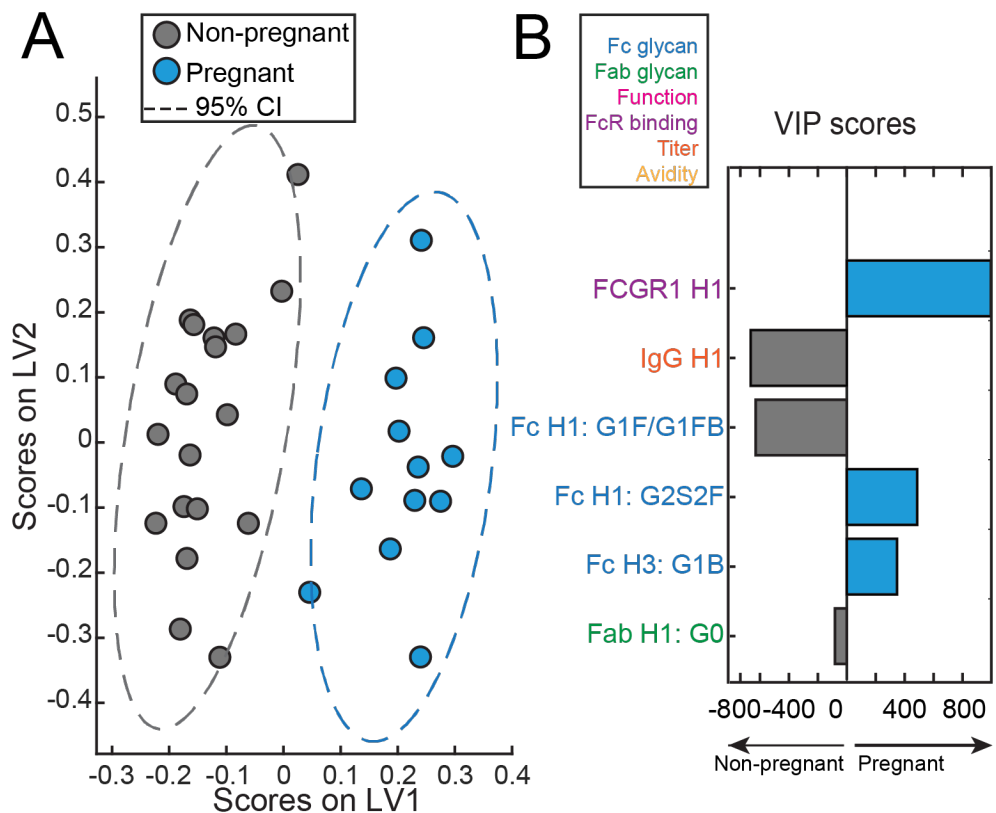

**Figure 5: Multivariate signatures of antibodies produced during pregnancy.**

Computational analysis was used to distinguish features enriched in pregnancy. **A.** LASSO Partial Least Squares Discriminant Analysis (LASSO-PLSDA) of influenza-specific antibody features between pregnant and non-pregnant women orthogonalized along latent variable 1 (LV1). LV1 explains 42.5% of the variance along the X axis while LV2 explained 17.1% of the variance. **B.** The Variable Importance in Projection (VIP) scores for the PLSDA indicate the prime factors driving the differences between pregnant and non-pregnant women. Factors pointing towards the left are enriched in non-pregnant samples, while those pointing right are enriched in pregnant samples. Bar color and length corresponds to relative importance. Antibody features are colored by category.

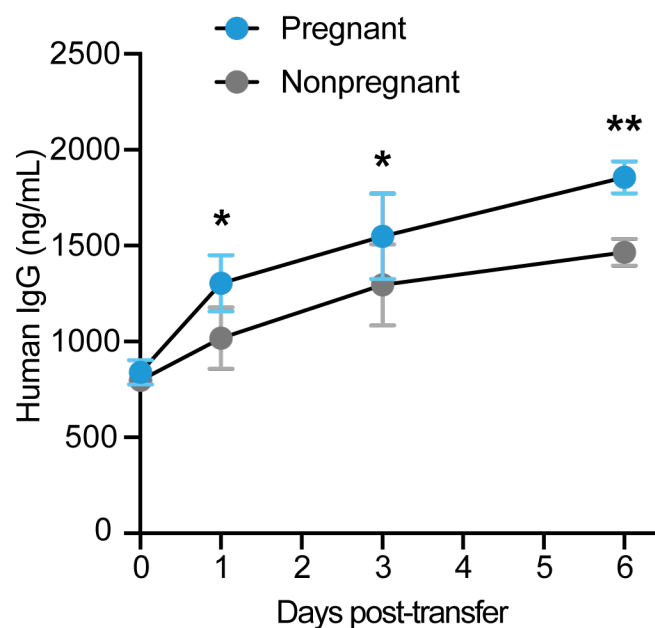

**Figure 6. In vivo antibody retention.**

The dot-line plot depicts the retention of IgG in mice injected with pooled plasma from pregnant (blue, 4 mice) or non-pregnant (grey, 5 mice) mice. Retention was measured over a 6-day period. Dots are at mean with error bars at the standard deviation. Statistics evaluated using a two-way ANOVA. \* $p < 0.05$ , \*\* $p < 0.01$ .

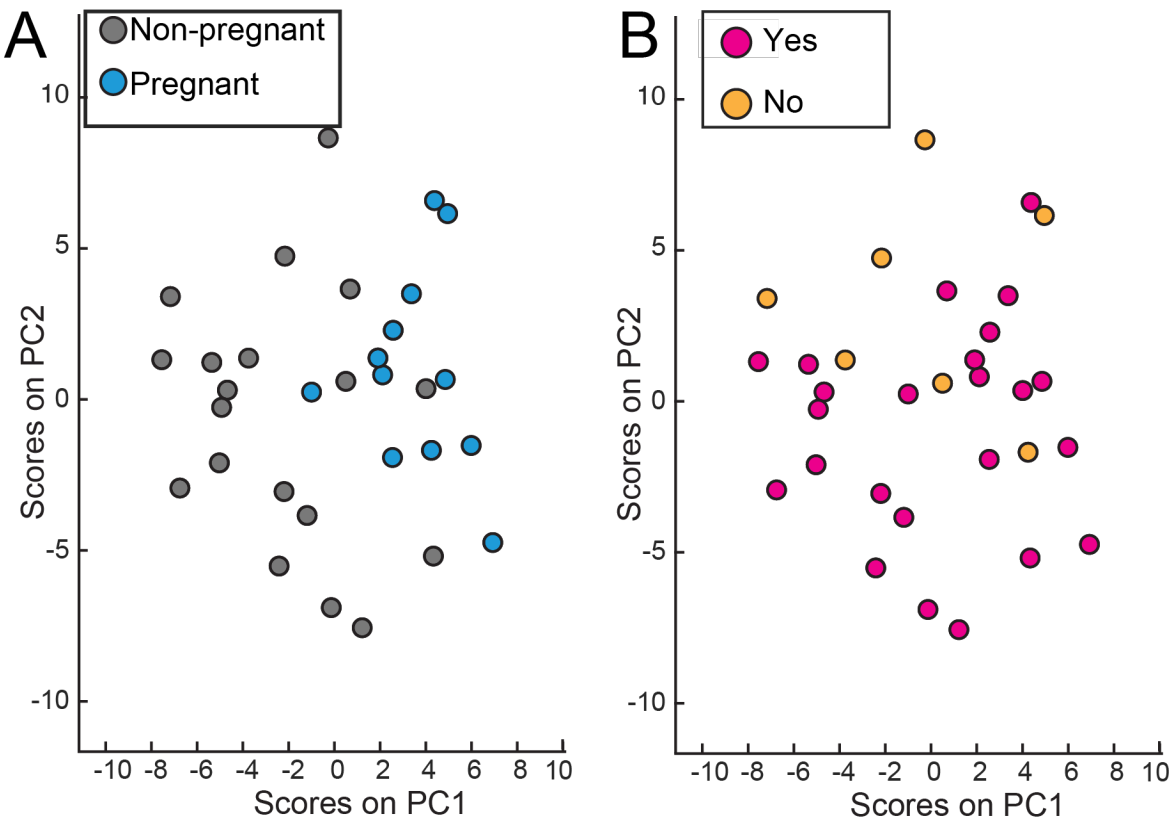

**Supplemental Figure 1: Relationship of antibody profiles and vaccination.**

PCA analysis was used to distinguish effects of vaccination. No differences were observed across the antibody profiles for vaccination and un-vaccinated participants. Principle component 1 (PC1) contains 12% of the variance and PC2 contains 10.5% of the variance. **A.** Dots colored to distinguish pregnant (blue dots) and non-pregnant (grey dots) women. **B.** Dots colored to distinguish women who received seasonal influenza vaccine (pink dots) and women without clinical record of vaccination (orange dots).
